# Supplementary material for: Dual-fixations of europium cations and TEMPO species on metal–organic frameworks for the aerobic oxidation of alcohols
Source: Royal Society of Chemistry journal article supplement (doi:10.1039/d0dt01324b), 2020-01-01

## *Electronic Supplementary Information*

Dual-fixations of europium cation and TEMPO species on metal-organic  
frameworks for aerobic oxidation of alcohols

### **Table of content**

|                                                                                           |     |
|-------------------------------------------------------------------------------------------|-----|
| General materials and methods                                                             | S2  |
| Synthesis of Eu(Me-BPY) <sub>2</sub> (NO <sub>3</sub> ) <sub>3</sub> and BPDC-TEMPO       | S3  |
| MOF characterizations                                                                     | S4  |
| Procedures for aerobic oxidations                                                         | S5  |
| General GC conditions                                                                     | S6  |
| Characterizations of aldehydes and ketones from aerobic oxidation                         | S7  |
| References for the ESI                                                                    | S23 |
| Appendix: Spectral copies of <sup>1</sup> H and <sup>13</sup> C NMR of obtained compounds | S24 |

## General materials and methods

Concentration of solution was performed using rotary evaporator, and followed by vacuum drying at 0.1-1 torr. All commercial reactants, reagents and solvents used without additional purification unless otherwise stated. All chemicals were purchased from Sigma-Aldrich, TCI, Alfa Aesar chemical company.

Thin layer chromatography (TLC) analysis was performed on pre-coated silica gel 60 F254 plates. Visualization on TLC was achieved by the use of UV light (254 and 365 nm). Flash column chromatography was undertaken on silica gel (400-630 mesh).  $^1\text{H}$  and  $^{13}\text{C}$  NMR (nuclear magnetic resonance) spectra were recorded on a FT AM 400 (400 MHz for  $^1\text{H}$  and 100 MHz for  $^{13}\text{C}$ ) or FT AM 500 (500 MHz for  $^1\text{H}$  and 125 MHz for  $^{13}\text{C}$ ). Chemical shifts were quoted in parts per million (ppm) referenced to the appropriate solvent peak. The following abbreviations were used to describe peak patterns when appropriate: br = broad, s = singlet, d = doublet, t = triplet, q = quartet, quin = quintet and m = multiplet. Coupling constants, J, were reported in Hertz unit (Hz).

Approximately 10 mg of MOFs were dried under vacuum and digested with sonication in 590  $\mu\text{L}$  of DMSO- $d_6$  and 10  $\mu\text{L}$  of HF (48% aqueous solution). Powder X-ray diffraction (PXRD) data were collected on Bruker AXS D8 Discover (at 40 kV, 40 mA for CuK $\alpha$  ( $\lambda = 1.5406 \text{ \AA}$ )) and Rigaku Miniflex 600 (at 40 kV, 15 mA) with a scan speed of 1.0 min/step, a step size of  $0.02^\circ$  in  $2\theta$ , and a  $2\theta$  range of  $3\text{--}50^\circ$ .  $\text{N}_2$  sorption isotherms of samples were obtained using a BELSORP-max at 77K. Thermogravimetric analysis (TGA) were performed under  $\text{N}_2$  atmosphere at a scan rate of  $5^\circ\text{C}/\text{min}$  using Q50 from TA instruments. PL measurements (examined by Fluoromax-4P Luminescence Spectrophotometer from HORIBA,  $\lambda_{\text{ex}} = 395 \text{ nm}$ ) for Eu species, Eu-based MOFs and Eu-loaded MOFs were in degassed aqueous solution at ambient temperature. ICP-OES analysis were collected on Perkin Elmer Optima 7300DV, with pretreatment 20 mg of sample in HF- $\text{HNO}_3$  (1:1=v/v) at  $200^\circ\text{C}$  for 1 h. GC (Gas Chromatography) analysis for determination of conversions was performed on an Younglin YL-6500. All quantum chemical calculations were performed using the optimized molecular geometry functional B3LYP/6-311G+g(d,p) as implemented in the Gaussian 09 software suite.<sup>S1,S2</sup>

## Synthesis of $\text{Eu}(\text{Me-BPY})_2(\text{NO}_3)_3$

To a solution of 5,5'-dimethyl-2,2'-bipyridine (37 mg, 0.20 mmol) in  $\text{CH}_3\text{CN}$  (2 mL) was added to a solution of  $\text{Eu}(\text{NO}_3)_3 \cdot 5\text{H}_2\text{O}$  (86 mg, 0.20 mmol) in  $\text{CH}_3\text{CN}$  (2 mL). The clear solution mixture was heated 60 °C for 12 h, a colorless precipitate was collected, washed with 3 times  $\text{CH}_3\text{CN}$  (2 mL) then dried under high vacuum for 12 h yielded  $\text{Eu}(\text{Me-BPY})_2(\text{NO}_3)_3$  as a colorless solid (60 mg, 85%).

## Synthesis of BPDC-TEMPO

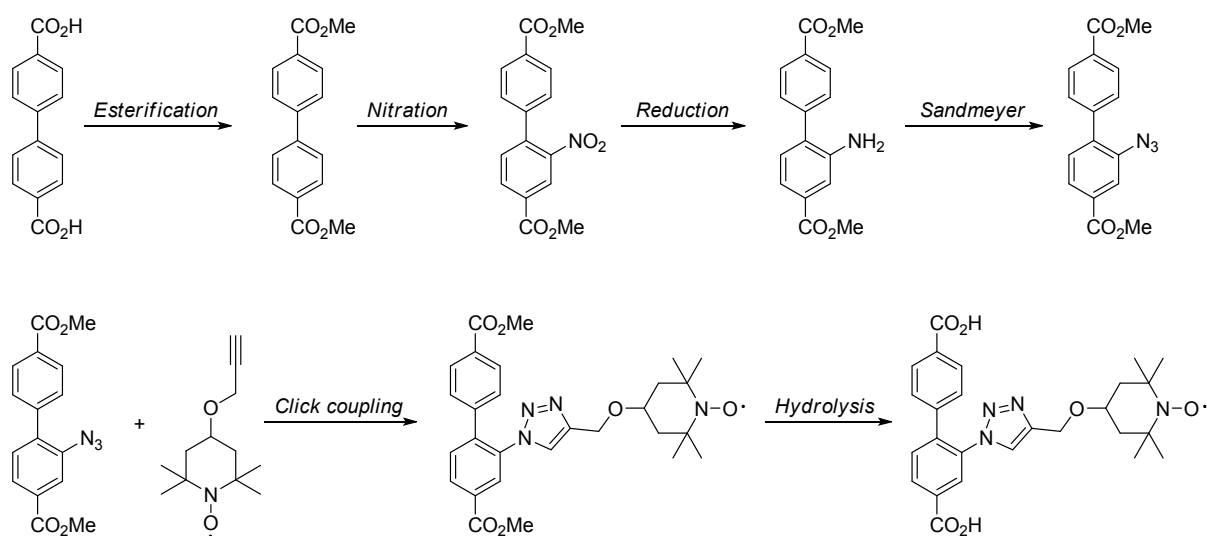

BPDC-TEMPO was synthesized according to the reported literature.<sup>S3</sup>

## MOF characterizations

**PXRD (Powder X-ray diffraction):** PXRD data was collected at ambient temperature on a Bruker D8 Discover at 40 kV, 40 mA and a Rigaku Miniflex at 40 kV, 15 mA for CuK $\alpha$  ( $\lambda = 1.5406 \text{ \AA}$ ), with a scan speed of 1 sec/step, a step size of  $0.02^\circ$  in  $2\theta$ , and a  $2\theta$  range of  $5\text{--}30^\circ$ .

**N<sub>2</sub> full isotherm for UiO-67-bpy and UiO-67-bpy-Eu:** Approximately 30-60 mg of MOF sample was evacuated under vacuum for a moment at room temperature. Samples were then transferred to a pre-weighed sample tube and degassed at  $120^\circ\text{C}$  on a Micromeritics ASAP 2020 Adsorption Analyzer for a minimum of 6 h or until the outgas rate was  $<5 \mu\text{mHg/min}$ . The sample tube was re-weighed to obtain a consistent mass for the degassed MOF materials. BET surface area ( $\text{m}^2/\text{g}$ ) measurements were collected at 77 K by N<sub>2</sub> on a Micromeritics ASAP 2020 Adsorption Analyzer using a volumetric technique.

**N<sub>2</sub> full isotherm for UiO-67-TEMPO, UiO-67-(bpy&TEMPO), UiO-67-(bpy-Eu&TEMPO):** These MOFs were measured according to activation at  $50^\circ\text{C}$  for 24 h.

**TGA (Thermogravimetric analysis):** Approximately 10 mg of MOF was used for TGA measurements, after BET analysis (activated). Sample was analyzed under a stream of N<sub>2</sub> using a TGA/DSC 1 running from room temperature to  $700^\circ\text{C}$  with a scan rate of  $5^\circ\text{C/min}$ .

**PL (Photoluminescence) Measurements:** PL measurements (examined by Fluoromax-4P Luminescence Spectrophotometer from HORIBA,  $\lambda_{\text{ex}} = 395 \text{ nm}$ ) for Eu species, Eu-based MOFs and Eu-loaded MOFs were in degassed aqueous solution at ambient temperature.

**Chemical stability of MOFs:** Approximately 20 mg of MOF was placed in 4 mL vials containing 2 mL of acetone, DCM, pyridine, H<sub>2</sub>O, 0.1 M HCl, 0.1 M NaOH. Samples were allowed to sit statically at  $25^\circ\text{C}$  for 24 h. The samples were filtered and recovered for analysis.

## Procedures for aerobic oxidations

**Condition I in Tables 2 and 3 (Eu-fixed):** Alcohol (0.25 mmol), UiO-67-bpy-Eu (2 mg, 0.0025 mmol), TEMPO (0.4 mg, 0.0025 mmol), sodium nitrate (0.2 mg, 0.0025 mmol) and toluene (1 mL) were added to a scintillation vial. Acetic acid (0.1 mL) was added to solution, and then the mixture was stirred at 60 °C under air. Resulting mixture was filtered by syringe filter and checked by conversion ratio with GC column or the desired product was isolated by a silica gel column chromatography.

**Condition II in Table 3 (TEMPO-fixed):** Alcohol (0.25 mmol),  $\text{Eu}(\text{NO}_3)_3$  (1 mg, 0.0025 mmol), UiO-67-TEMPO (3 mg, 0.0025 mmol), sodium nitrate (0.2 mg, 0.0025 mmol) and toluene (1 mL) were added to a scintillation vial. Acetic acid (0.1 mL) was added to solution, and then the mixture was stirred at 60 °C under air. Resulting mixture was filtered by syringe filter and checked by conversion ratio with GC column or the desired product was isolated by a silica gel column chromatography.

**Condition III in Table 3 (Eu & TEMPO-fixed):** Alcohol (0.25 mmol), UiO-67-bpy-Eu (2 mg, 0.0025 mmol), UiO-67-TEMPO (3 mg, 0.0025 mmol), sodium nitrate (0.2 mg, 0.0025 mmol) and toluene (1 mL) were added to a scintillation vial. Acetic acid (0.1 mL) was added to solution, and then the mixture was stirred at 60 °C for 18 h under air. Resulting mixture was filtered by syringe filter and checked by conversion ratio with GC column or the desired product was isolated by a silica gel column chromatography.

**Condition IV in Table 3 (Eu-fixed + TEMPO-fixed):** Alcohol (0.25 mmol), UiO-67-(bpy-Eu)(TEMPO) (6 mg, 0.0025 mmol), sodium nitrate (0.2 mg, 0.0025 mmol) and toluene (1 mL) were added to a scintillation vial. Acetic acid (0.1 mL) was added to solution, and then the mixture was stirred at 60 °C for 18 h under air. Resulting mixture was filtered by syringe filter and checked by conversion ratio with GC column or the desired product was isolated by a silica gel column chromatography.

## General GC conditions

**GC-Condition #1:** GsBP-5 column, 30m x 0.32mm (id); FID detector, 300 °C; injection: 200 °C; carrier gas: nitrogen; carrier gas rate: 1 mL / min; area normalization:

- Reaction condition optimization experiments (Table 1), and the detection of benzyl alcohol (**1a**), 4-chlorobenzylalcohol (**1d**), 3-chlorobenzylalcohol (**1e**), 2-chlorobenzylalcohol (**1f**), 2-thiophene methanol (**1k**), and 3-thiophene methanol (**1l**) were performed under a Condition Is column temperature: 120 °C for 2 minutes, increasing to 190 °C in a rate of 10 °C / min.
- 4-Nitrobenzylalcohol (**1b**), 4-bromobenzylalcohol (**1c**), 4-methylbenzylalcohol (**1g**), 4-methoxybenzylalcohol (**1h**), 3-methoxybenzylalcohol (**1i**), 2-methoxybenzylalcohol (**1j**) were detected under a Condition Is column temperature: 150 °C for 2 minutes, raising to 210 °C in a rate of 10 °C / min.
- 1-Hexanol (**1m**) and 2-heptanol (**1n**) were detected under a Condition Is column temperature: 80 °C for 1 minutes, raising to 100 °C in a rate of 1 °C / min
- Diphenyl ketone (**2o**) was detected under a Condition Is column temperature: 120 °C for 1 minutes, raising to 190 °C in a rate of 2 °C / min.

**GC-Condition #2:** DB-5 column, 30m x 0.32mm (id); FID detector, 350 °C; injection: 250 °C; carrier gas: nitrogen; carrier gas rate: 1 mL / min; area normalization.

- Pyrenyl aldehyde (**2p**) was detected under a Condition Is column temperature: 120 °C for 2 minutes, raising to 330 °C in a rate of 15 °C / min.

## Characterizations of aldehydes or ketones from aerobic oxidations

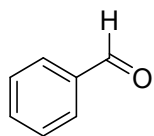

**Benzaldehyde (2a)**<sup>S3</sup>: Desire product was isolated by flash column purification with ethyl acetate/*n*-hexane (1/30, v/v) as the eluent. <sup>1</sup>H NMR (400 MHz, CDCl<sub>3</sub>) δ 10.03 (s, 1H), 7.90-7.88 (m, 2H), 7.64-7.62 (m, 1H), 7.56-7.52 (m, 2H); <sup>13</sup>C NMR (100 MHz, CDCl<sub>3</sub>) δ 192.6, 136.5, 134.6, 129.9, 129.1.

Condition I in Tables 1 and 2: Isolation yield (98%, 26 mg), obtained as a colorless liquid.

Condition II in Table 3: GC conversion (99%, 9 h).

Condition III in Table 3: GC conversion (65%, 18 h).

Condition IV in Table 3: GC conversion (70%, 18 h).

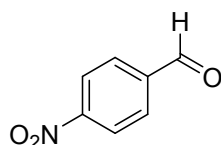

**4-Nitrobenzaldehyde (2b)**<sup>S3</sup>: Desire product was isolated by flash column purification with ethyl acetate/*n*-hexane (1/10, v/v) as the eluent, obtained as a pale yellow liquid. <sup>1</sup>H NMR (500 MHz, CDCl<sub>3</sub>) δ 10.15 (s, 1H), 8.40-8.37 (m, 2H), 8.09-8.06 (m, 2H); <sup>13</sup>C NMR (125 MHz, CDCl<sub>3</sub>) δ 190.5, 151.3, 140.2, 130.6, 124.4.

Condition I: GC conversion (99%, 9 h).

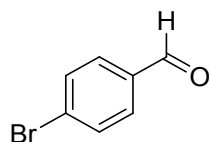

**4-Bromobenzaldehyde (2c)**<sup>S3</sup>: Desire product was isolated by flash column purification with ethyl acetate-hexane (1:20 v/v) as the eluent, obtained as a colorless solid. <sup>1</sup>H NMR (500 MHz, CDCl<sub>3</sub>) δ 9.97 (s, 1H), 7.75-7.73 (m, 2H), 7.69-7.67 (m, 2H); <sup>13</sup>C NMR (125 MHz, CDCl<sub>3</sub>) δ 191.2, 135.2, 132.6, 131.1, 129.9.

Condition I: GC conversion (99%, 11 h).

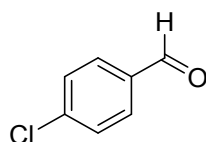

**4-Chlorobenzaldehyde (2d)**<sup>S3</sup>: Desire product was isolated by flash column purification with ethyl acetate-hexane (1:20 v/v) as the eluent, obtained as a colorless solid. <sup>1</sup>H NMR (400 MHz, CDCl<sub>3</sub>) δ

9.98 (s, 1H), 7.84-7.82 (m, 2H), 7.53-7.51 (m, 2H);  $^{13}\text{C}$  NMR (100 MHz,  $\text{CDCl}_3$ )  $\delta$  191.0, 141.1, 134.8, 131.1, 129.6.

Condition I: GC conversion (99%, 11 h).

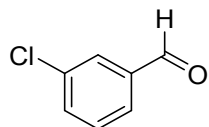

**3-Chlorobenzaldehyde (2e)**<sup>S3</sup>: Desire product was isolated by flash column purification with ethyl acetate/*n*-hexane (1/30 v/v) as the eluent, obtained as a light yellow liquid.  $^1\text{H}$  NMR (500 MHz,  $\text{CDCl}_3$ )  $\delta$  10.47 (s, 1H), 7.92-7.90 (m, 1H), 7.78-7.76 (m, 1H), 7.45-7.43 (m, 1H), 7.39-7.36 (m, 1H);  $^{13}\text{C}$  NMR (125 MHz,  $\text{CDCl}_3$ )  $\delta$  189.9, 138.0, 135.2, 132.6, 130.7, 129.5, 127.4.

Condition I: GC conversion (99%, 8 h).

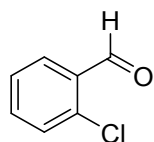

**2-Chlorobenzaldehyde (2f)**<sup>S3</sup>: Desire product was isolated by flash column purification with ethyl acetate-hexane (1:30 v/v) as the eluent, obtained as a light yellow liquid.  $^1\text{H}$  NMR (500 MHz,  $\text{CDCl}_3$ )  $\delta$  9.97 (s, 1H), 7.85-7.85 (m, 1H), 7.77-7.75 (m, 1H), 7.61-7.58 (m, 1H), 7.50-7.47 (m, 1H);  $^{13}\text{C}$  NMR (125 MHz,  $\text{CDCl}_3$ )  $\delta$  190.1, 137.9, 135.6, 134.5, 130.5, 129.4, 128.1.

Condition I: GC conversion (99%, 13 h).

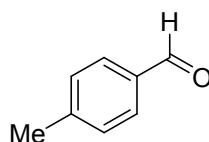

**4-Methylbenzaldehyde (2g)**<sup>S3</sup>: Desire product was isolated by flash column purification with ethyl acetate/*n*-hexane (1/20, v/v) as the eluent, obtained as a colorless liquid.  $^1\text{H}$  NMR (500 MHz,  $\text{CDCl}_3$ )  $\delta$  9.95 (s, 1H), 7.78-7.77 (m, 2H), 7.34-7.32 (m, 2H), 2.44 (s, 3H);  $^{13}\text{C}$  NMR (125 MHz,  $\text{CDCl}_3$ )  $\delta$  192.2, 145.7, 134.4, 130.0, 129.9, 22.0.

Condition I: GC conversion (99%, 11 h).

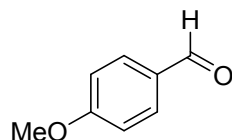

**4-Methoxybenzaldehyde (2h)**<sup>S3</sup>: Desire product was isolated by flash column purification with ethyl acetate/*n*-hexane (1/30, v/v) as the eluent, obtained as a colorless liquid.  $^1\text{H}$  NMR (500 MHz,  $\text{CDCl}_3$ )  $\delta$



9.88 (s, 1H), 7.84-7.82 (m, 2H), 7.00-6.99 (m, 2H), 3.88 (s, 3H);  $^{13}\text{C}$  NMR (125 MHz,  $\text{CDCl}_3$ )  $\delta$  190.9, 164.7, 132.1, 130.1, 114.4, 55.7.

Condition I: GC conversion (99%, 18 h).

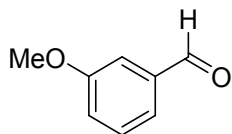

**3-Methoxybenzaldehyde (2i)**<sup>S3</sup>: Desire product was isolated by flash column purification with ethyl acetate/*n*-hexane (1/30, v/v) as the eluent, obtained as a colorless liquid.  $^1\text{H}$  NMR (400 MHz,  $\text{CDCl}_3$ )  $\delta$  9.98 (s, 1H), 7.46-7.44 (m, 2H), 7.40-7.39 (m, 1H), 7.20-7.17 (m, 1H) 3.87 (s, 3H);  $^{13}\text{C}$  NMR (100 MHz,  $\text{CDCl}_3$ )  $\delta$  192.3, 160.3, 137.9, 130.2, 123.7, 121.7, 112.2, 55.6.

Condition I: GC conversion (99%, 8 h).

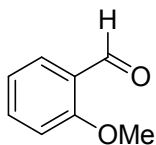

**2-Methoxybenzaldehyde (2j)**<sup>S3</sup>: Desire product was isolated by flash column purification with ethyl acetate-hexane (1:30 v/v) as the eluent, obtained as a colorless liquid.  $^1\text{H}$  NMR (400 MHz,  $\text{CDCl}_3$ )  $\delta$  10.47 (s, 1H), 7.84-7.82 (dd, 1H,  $J$  = 9.6, 2.3 Hz), 7.58-7.53 (ddd, 1H,  $J$  = 10.6, 9.2, 2.3 Hz), 7.05-6.98 (m, 2H) 3.93 (s, 3H);  $^{13}\text{C}$  NMR (100 MHz,  $\text{CDCl}_3$ )  $\delta$  190.0, 162.0, 136.1, 128.7, 125.0, 120.8, 111.7, 55.8.

Condition I: GC conversion (99%, 14 h).

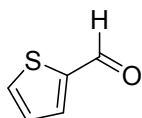

**2-Thiophenecarboxaldehyde (2k)**<sup>S4</sup>: Desire product was isolated by flash column purification with ethyl acetate-hexane (1:30 v/v) as the eluent, obtained as a colorless liquid.  $^1\text{H}$  NMR (500 MHz,  $\text{CDCl}_3$ )  $\delta$  9.95 (s, 1H), 7.79-7.78 (dd, 1H,  $J$  = 3.8, 1.2 Hz), 7.78-7.78 (m, 1H), 7.23-7.21 (dd, 1H,  $J$  = 4.9, 3.8 Hz);  $^{13}\text{C}$  NMR (125 MHz,  $\text{CDCl}_3$ )  $\delta$  183.1, 144.2, 136.4, 135.3, 128.4.

Condition I: GC conversion (99%, 9 h).

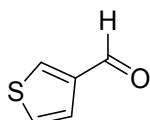

**3-Thiophenecarboxaldehyde (2l)**<sup>S4</sup>: Desire product was isolated by flash column purification with ethyl acetate-hexane (1:30 v/v) as the eluent, obtained as a colorless liquid. <sup>1</sup>H NMR (500 MHz, CDCl<sub>3</sub>) δ 9.94 (s, 1H), 8.13-8.12 (dd, 1H, *J* = 2.9, 1.2 Hz), 7.56-7.54 (dd, 1H, *J* = 5.1, 1.1 Hz), 7.39-7.37 (ddd, 1H, *J* = 5.1, 2.9, 0.9 Hz); <sup>13</sup>C NMR (125 MHz, CDCl<sub>3</sub>) δ 185.1, 143.2, 136.8, 127.5, 125.5.  
Condition I: GC conversion (99%, 12 h).

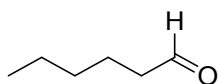

**1-Hexanal (2m)**<sup>S4</sup>: Desire product was isolated by flash column purification with ethyl acetate-hexane (1:40 v/v) as the eluent, obtained as a colorless liquid. <sup>1</sup>H NMR (500 MHz, CDCl<sub>3</sub>) δ 9.76 (s, 1H), 2.43-2.40 (td, 2H, *J* = 7.4, 1.9 Hz), 1.66-1.61 (m, 2H), 1.35-1.29 (m, 4H) 0.91-0.88 (t, 3H, *J* = 7.0 Hz); <sup>13</sup>C NMR (125 MHz, CDCl<sub>3</sub>) δ 203.2, 44.0, 31.5, 22.5, 21.9, 14.0.  
Condition I: GC conversion (99%, 15 h).

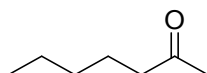

**2-Heptanone (2n)**<sup>S4</sup>: Desire product was isolated by flash column purification with ethyl acetate-hexane (1:40 v/v) as the eluent, obtained as a colorless liquid. <sup>1</sup>H NMR (500 MHz, CDCl<sub>3</sub>) δ 2.43-2.40 (t, 3H, *J* = 7.5 Hz), 2.13 (s, 3H), 1.60-1.54 (quint, 2H, *J* = 7.6 Hz) 1.32-1.24 (m, 4H), 0.90-0.87 (t, 3H, *J* = 7.3 Hz); <sup>13</sup>C NMR (125 MHz, CDCl<sub>3</sub>) δ 209.6, 43.9, 34.5, 30.0, 23.7, 22.6, 14.1.  
Condition I: GC conversion (99%, 18 h).

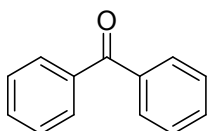

**Diphenyl ketone (2o)**<sup>S3</sup>: Desire product was isolated by flash column purification with ethyl acetate-hexane (1:40 v/v) as the eluent, obtained as a colorless solid. <sup>1</sup>H NMR (400 MHz, CDCl<sub>3</sub>) δ 7.82-7.80 (m, 4H), 7.59-7.57 (m, 2H), 7.51-7.47 (m, 4H); <sup>13</sup>C NMR (100 MHz, CDCl<sub>3</sub>) δ 196.9, 137.7, 132.6, 130.2, 128.4.  
Condition I: GC conversion (99%, 11 h).  
Condition II: GC conversion (99%, 11 h).  
Condition III: GC conversion (49%, 18 h).  
Condition IV: GC conversion (48%, 18 h).

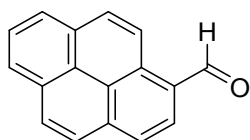

**1-Pyrenecarboxaldehyde (2p)**<sup>S3</sup>: Desire product was isolated by flash column purification with ethyl acetate-hexane (1:40 v/v) as the eluent, obtained as a light yellow solid. <sup>1</sup>H NMR (500 MHz, CDCl<sub>3</sub>) δ 10.62 (s, 1H), 9.18-9.16 (d, 1H, *J* = 9.3 Hz), 8.21-8.20 (d, 1H, *J* = 7.9 Hz), 8.15-8.13 (d, 1H, *J* = 7.6 Hz), 8.09-8.07 (d, 1H, *J* = 9.25 Hz), 8.04-8.02 (d, 1H, *J* = 8.9 Hz), 8.00-7.96 (m, 2H), 7.87-7.85 (d, 1H, *J* = 8.9 Hz); <sup>13</sup>C NMR (125 MHz, CDCl<sub>3</sub>) δ 192.9, 135.2, 131.0, 130.8, 130.7, 130.5, 130.5, 130.2, 127.1, 127.0, 126.9, 126.7, 126.4, 124.3, 124.3, 123.8, 122.7.

Condition I: GC conversion (99%, 11 h).

Condition II: GC conversion (68%, 18 h).

Condition III: GC conversion (42%, 18 h).

Condition IV: GC conversion (45%, 18 h).

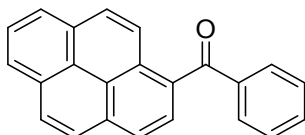

**phenyl(pyren-1-yl)methanone (2q)**<sup>S3</sup>: Desire product was isolated by flash column purification with ethyl acetate-hexane (1:40 v/v) as the eluent. Isolation yield (85%, 18 h), obtained as a light yellow solid. <sup>1</sup>H NMR (500 MHz, DMSO) δ 8.40-8.09 (m, 9H), 7.81-7.79 (dd, 2H, *J* = 8.1, 1.3 Hz), 7.72-7.69 (dt, 1H, *J* = 8.6, 1.1 Hz), 7.58-7.54 (t, 2H, *J* = 7.9 Hz), <sup>13</sup>C NMR (125 MHz, CDCl<sub>3</sub>) δ 197.6, 138.1, 133.7, 132.9, 132.5, 130.8, 130.1, 130.1, 129.1, 128.9, 128.9, 128.7, 127.3, 126.9, 126.7, 126.4, 126.1, 124.2, 124.2, 123.9, 123.6.

Condition I: Isolation yield (85%, 65 mg, 18 h), obtained as a light yellow solid.

Condition II: Isolation yield (60%, 46 mg, 18 h), obtained as a light yellow solid.

Condition III: Isolation yield (30%, 23 mg, 18 h), obtained as a light yellow solid.

Condition IV: Isolation yield (28%, 21 mg, 18 h), obtained as a light yellow solid.

**Table S1.** Crystal data and structure refinement for Eu(Me-BPY)<sub>2</sub>(NO<sub>3</sub>)<sub>3</sub>.

|                                   |                                                                 |          |
|-----------------------------------|-----------------------------------------------------------------|----------|
| Identification code               | Eu(Me-BPY) <sub>2</sub> (NO <sub>3</sub> ) <sub>3</sub>         |          |
| Empirical formula                 | C <sub>24</sub> H <sub>24</sub> EuN <sub>7</sub> O <sub>9</sub> |          |
| Formula weight                    | 706.47                                                          |          |
| Temperature                       | 293(2) K                                                        |          |
| Wavelength                        | 0.71073Å                                                        |          |
| Crystal system                    | Orthorhombic                                                    |          |
| Space group                       | P b c n                                                         |          |
| Unit cell dimensions              | a = 16.643(3) Å                                                 | α = 90°. |
|                                   | b = 9.4200(19)Å                                                 | β = 90°. |
|                                   | c = 17.491(4)Å                                                  | γ = 90°. |
| Volume                            | 2742.2(9)Å <sup>3</sup>                                         |          |
| Z                                 | 4                                                               |          |
| Density (calculated)              | 1.745Mg/m <sup>3</sup>                                          |          |
| Absorption coefficient            | 2.354mm <sup>-1</sup>                                           |          |
| F(000)                            | 1436                                                            |          |
| Crystal size                      | 0.3 x 0.2 x 0.1mm <sup>3</sup>                                  |          |
| Theta range for data collection   | 3.379 to 27.497°.                                               |          |
| Index ranges                      | -21<=h<=21, -12<=k<=12, -22<=l<=22                              |          |
| Reflections collected             | 25638                                                           |          |
| Independent reflections           | 3154[R(int) = 0.0642]                                           |          |
| Completeness to theta= 25.242°    | 99.8 %                                                          |          |
| Absorption correction             | Semi-empirical from equivalents                                 |          |
| Max. and min. transmission        | 0.790 and 0.574                                                 |          |
| Refinement method                 | Full-matrixleast-squares on F <sup>2</sup>                      |          |
| Data / restraints / parameters    | 3154 / 0 / 189                                                  |          |
| Goodness-of-fit on F <sup>2</sup> | 1.008                                                           |          |
| Final R indices [I>2sigma(I)]     | R1 = 0.0357, wR2 = 0.0986                                       |          |
| R indices (all data)              | R1 = 0.0579, wR2 = 0.1227                                       |          |
| Extinction coefficient            | n/a                                                             |          |
| Largest diff. peak and hole       | 1.020 and -1.123 e.Å <sup>-3</sup>                              |          |

**Table S2.** Calculated BET surface area, pore volume, and pore size of UiO-67-bpy, UiO-67-bpy-Eu, UiO-67-(bpy&TEMPO), and UiO-67-(bpy-Eu&TEMPO).

| Entry | MOF                   | BET surface area (m <sup>2</sup> /g) | Pore volume (cm <sup>3</sup> /g) | NLDFT pore size (nm) |
|-------|-----------------------|--------------------------------------|----------------------------------|----------------------|
| 1     | UiO-67-bpy            | 1828                                 | 0.96                             | 1.12                 |
| 2     | UiO-67-bpy-Eu         | 671                                  | 0.36                             | 1.05                 |
| 3     | UiO-67-(bpy&TEMPO)    | 1372                                 | 0.73                             | 1.12                 |
| 4     | UiO-67-(bpy-Eu&TEMPO) | 609                                  | 0.33                             | 0.97                 |

**Table S3.** Molecular formula and ICP-OES data of UiO-67-bpy-Eu and UiO-67-(bpy-Eu&TEMPO).

| Entry | MOF                   | Molecular formula of MOFs from ideal structures                                                              | ICP-OES element | Amount (ppm [μmol]) |
|-------|-----------------------|--------------------------------------------------------------------------------------------------------------|-----------------|---------------------|
| 1     | UiO-67-bpy-Eu         | Zr <sub>6</sub> O <sub>4</sub> (bpydc-Eu) <sub>4.5</sub> (bpydc) <sub>1.5</sub>                              | Zr              | 113050 [1239]       |
|       |                       |                                                                                                              | Eu              | 144710 [952]        |
| 2     | UiO-67-(bpy-Eu&TEMPO) | Zr <sub>6</sub> O <sub>4</sub> (bpydc-Eu) <sub>2.5</sub> (bpydc) <sub>1.1</sub> (bpydc-TEMPO) <sub>2.4</sub> | Zr              | 142672 [1564]       |
|       |                       |                                                                                                              | Eu              | 99167 [653]         |

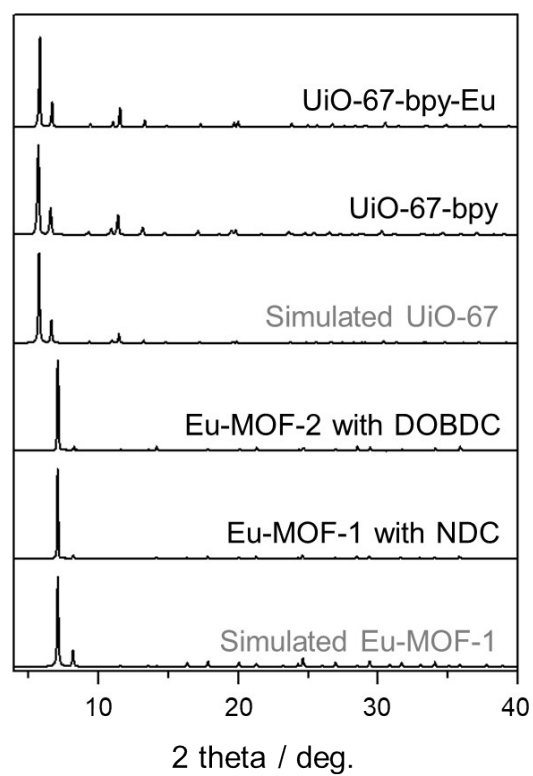

**Fig. S1** PXRD of Eu-MOF-1, Eu-MOF-2, UiO-67-bpy and UiO-67-bpy-Eu.

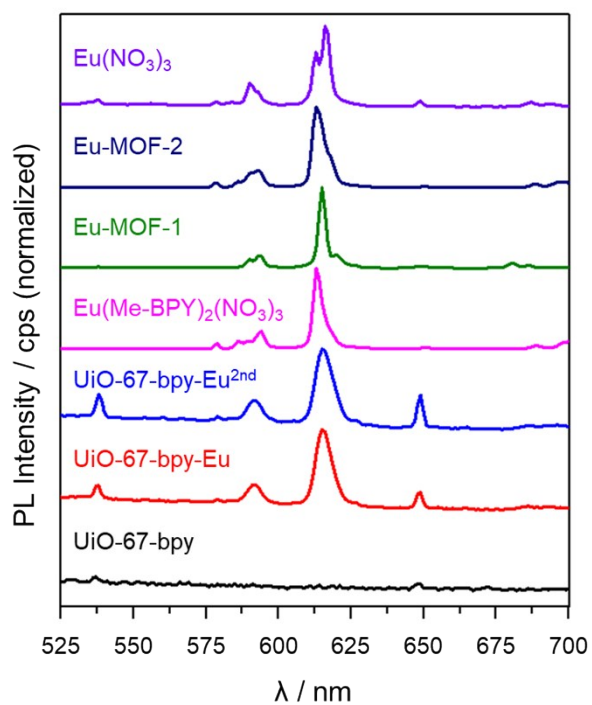

**Fig. S2** PL spectra of Eu species, Eu-based MOFs and Eu-loaded MOFs.

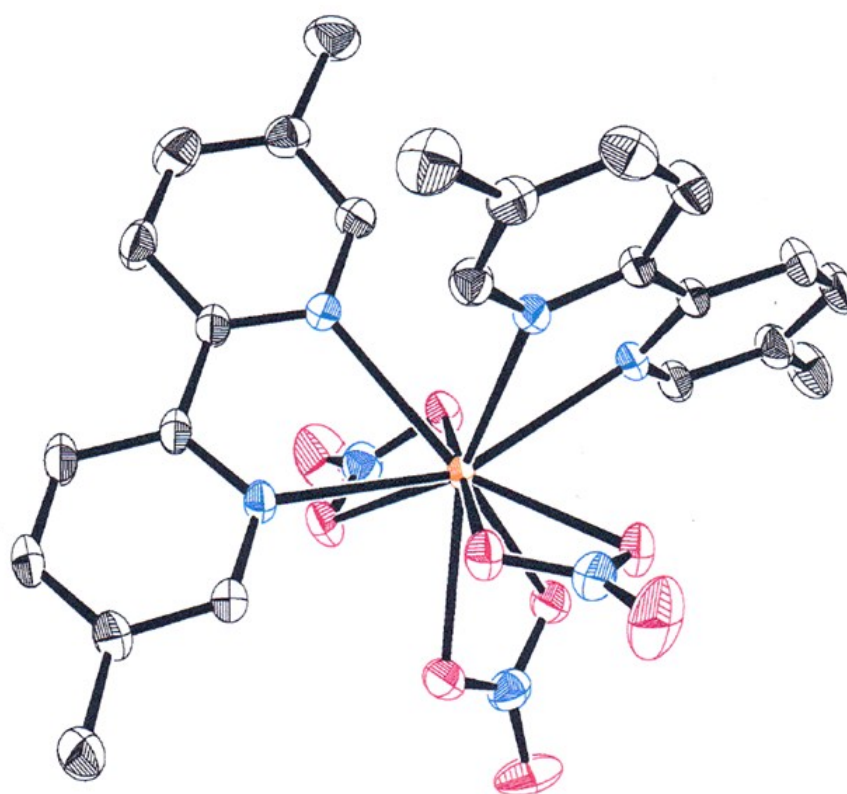

**Fig. S3** X-ray structure of  $\text{Eu}(\text{Me-BPY})_2(\text{NO}_3)_3$ .

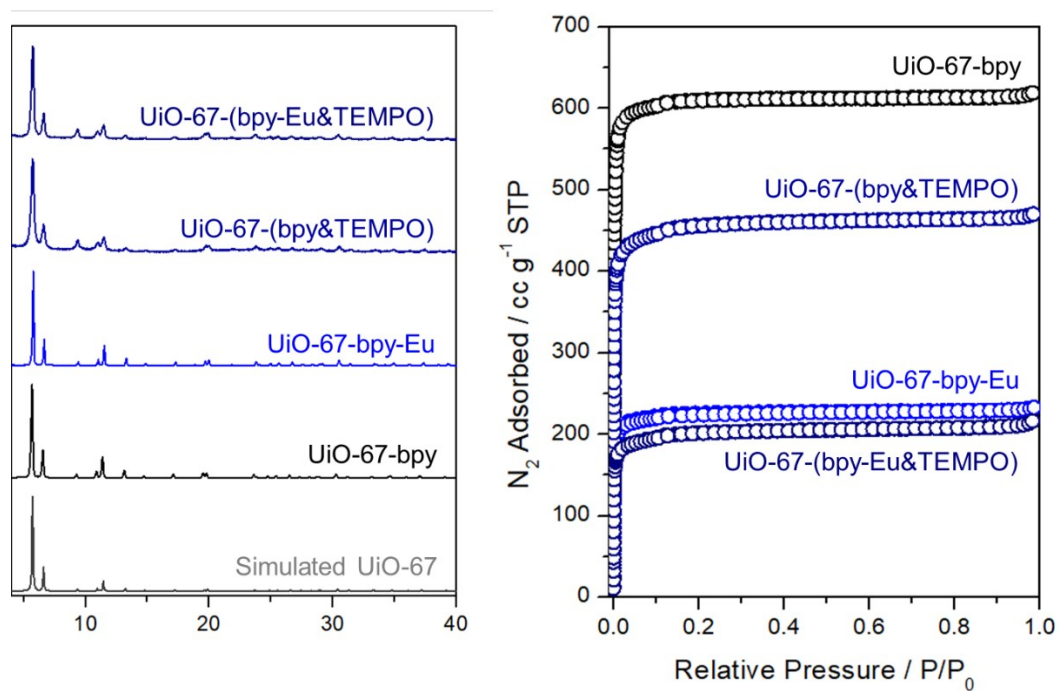

**Fig. S4** PXRD patterns and N<sub>2</sub> full isotherms of Eu-loaded or/and TEMPO-functionalized UiO-67s

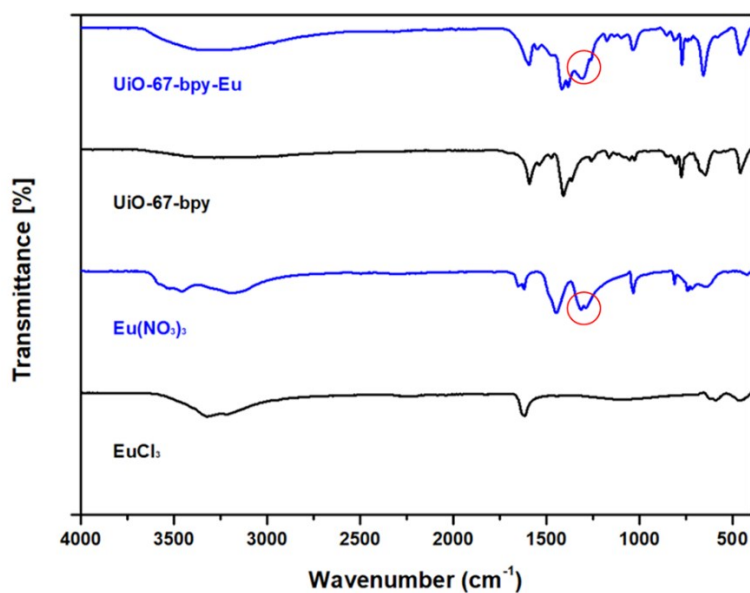

**Fig. S5** IR spectra of UiO-67-bpy and UiO-67-Eu after metalation with Eu(NO<sub>3</sub>)<sub>3</sub> to confirm the existence of NO<sub>3</sub><sup>-</sup> in the framework (reference IR peaks of nitrate anion: 1410-1340 for antisymmetric stretch.<sup>S15</sup>)



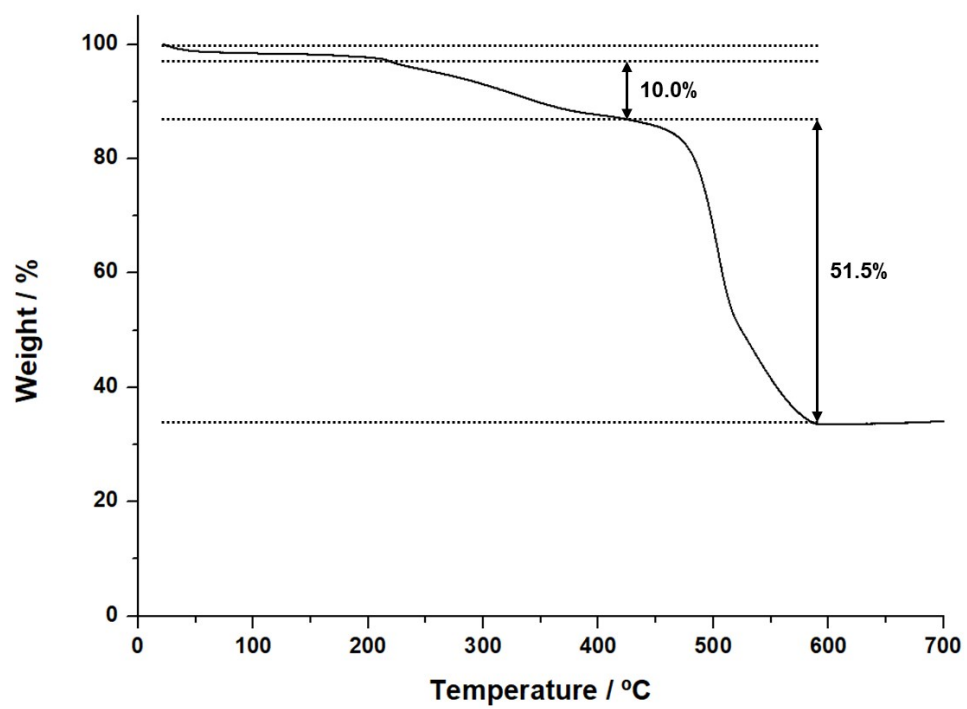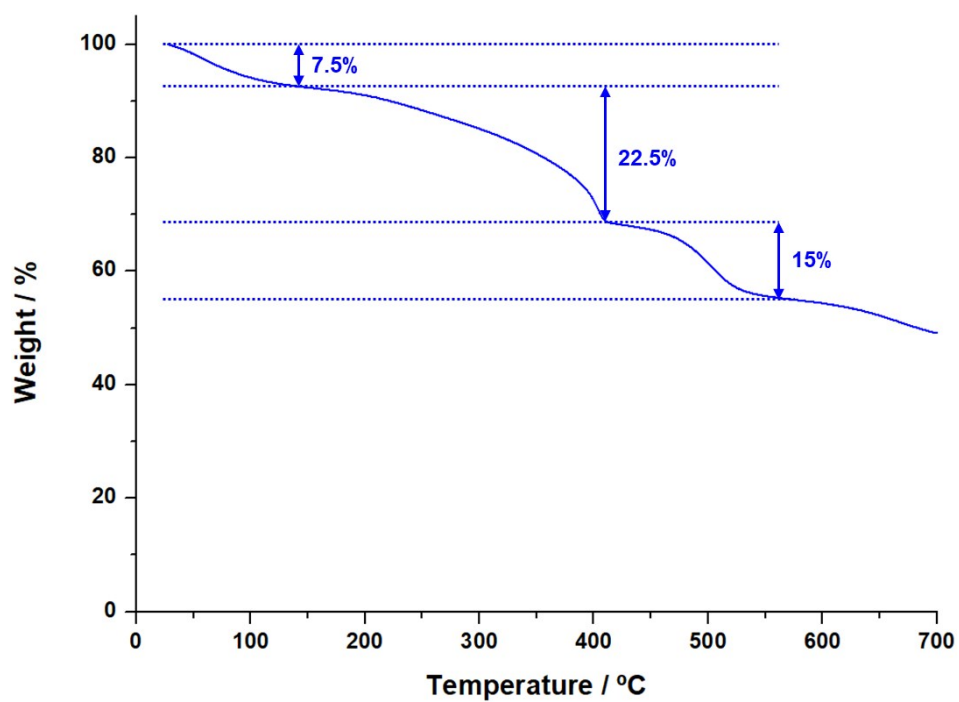

**Fig. S6** TGA of UiO-67-bpy (top, black line) and UiO-67-bpy-Eu (bottom, blue line).

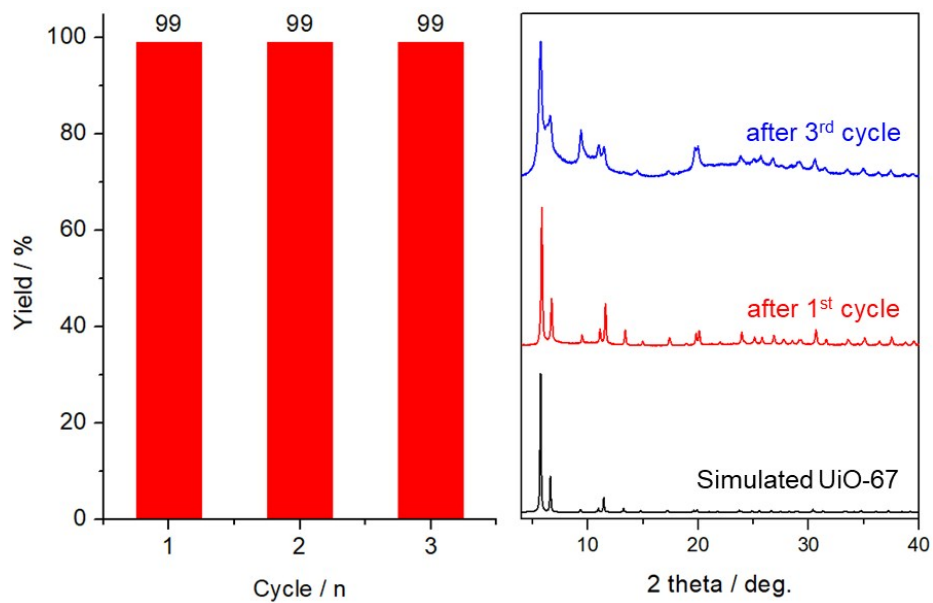

**Fig. S7** Reusable test and PXRD of recovered UiO-67-bpy-Eu after aerobic oxidation reaction.

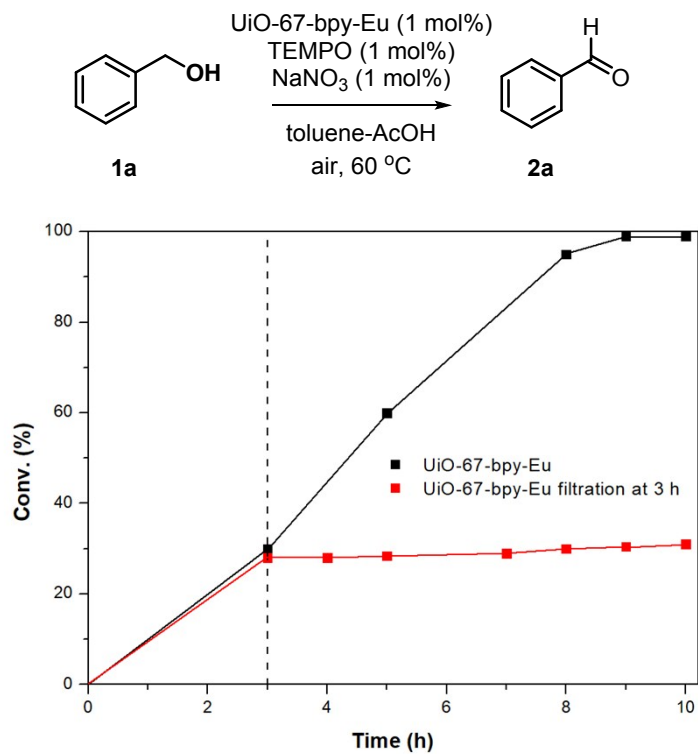

**Fig. S8** Hot filtration test for the aerobic oxidation of benzyl alcohol with UiO-67-bpy-Eu.

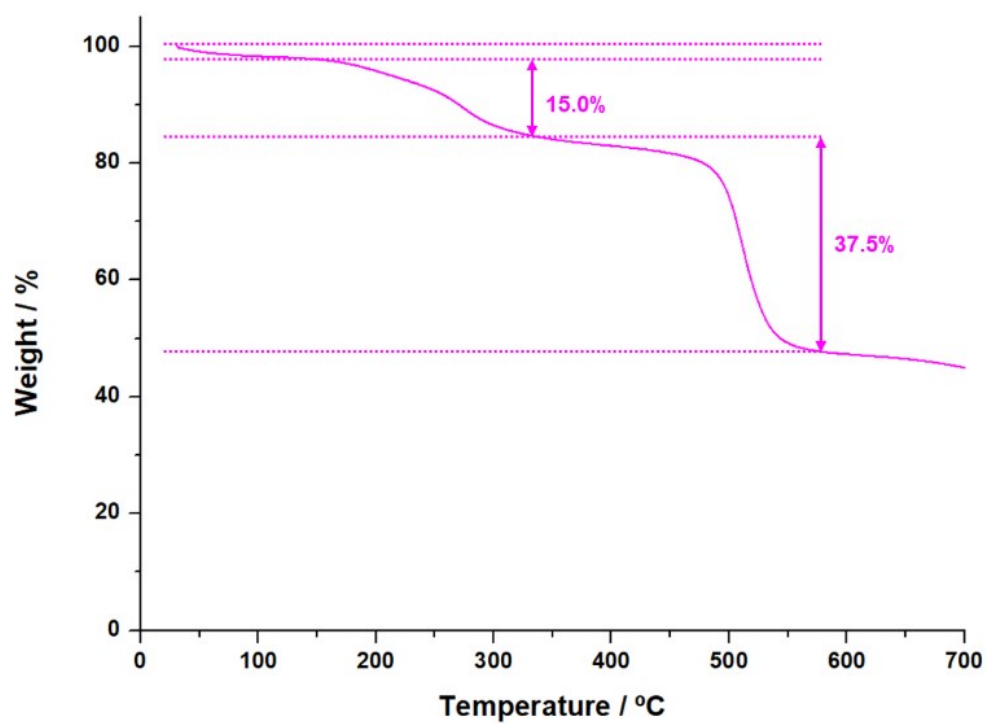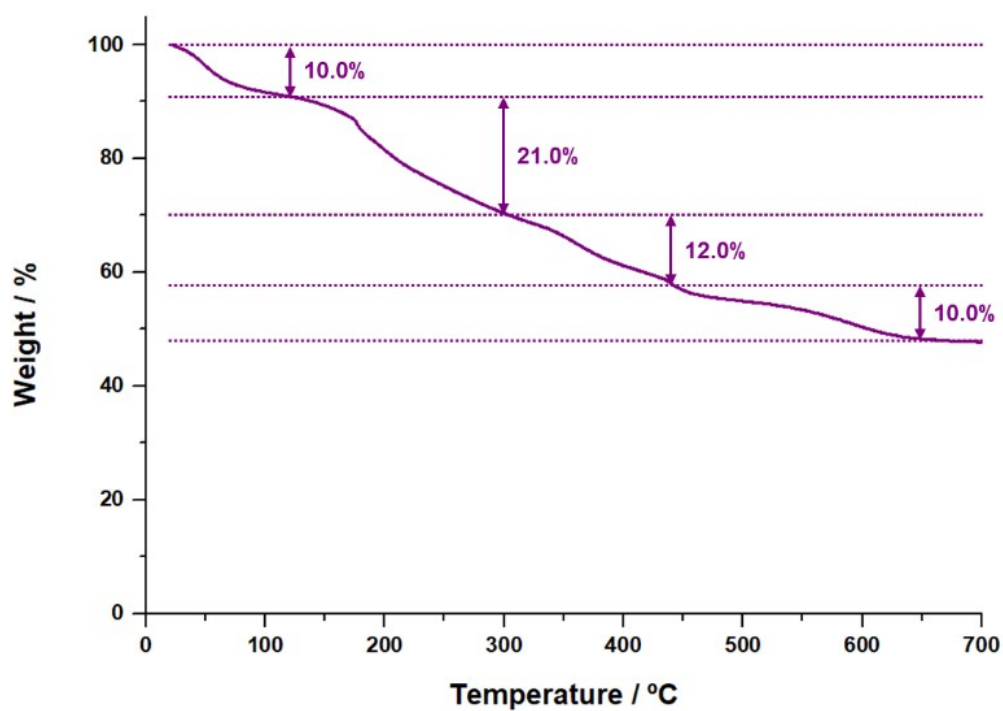

**Fig. S9** TGA of UiO-67-(bpy&TEMPO) (middle, pink line) and UiO-67-(bpy-Eu&TEMPO) (bottom, purple line).

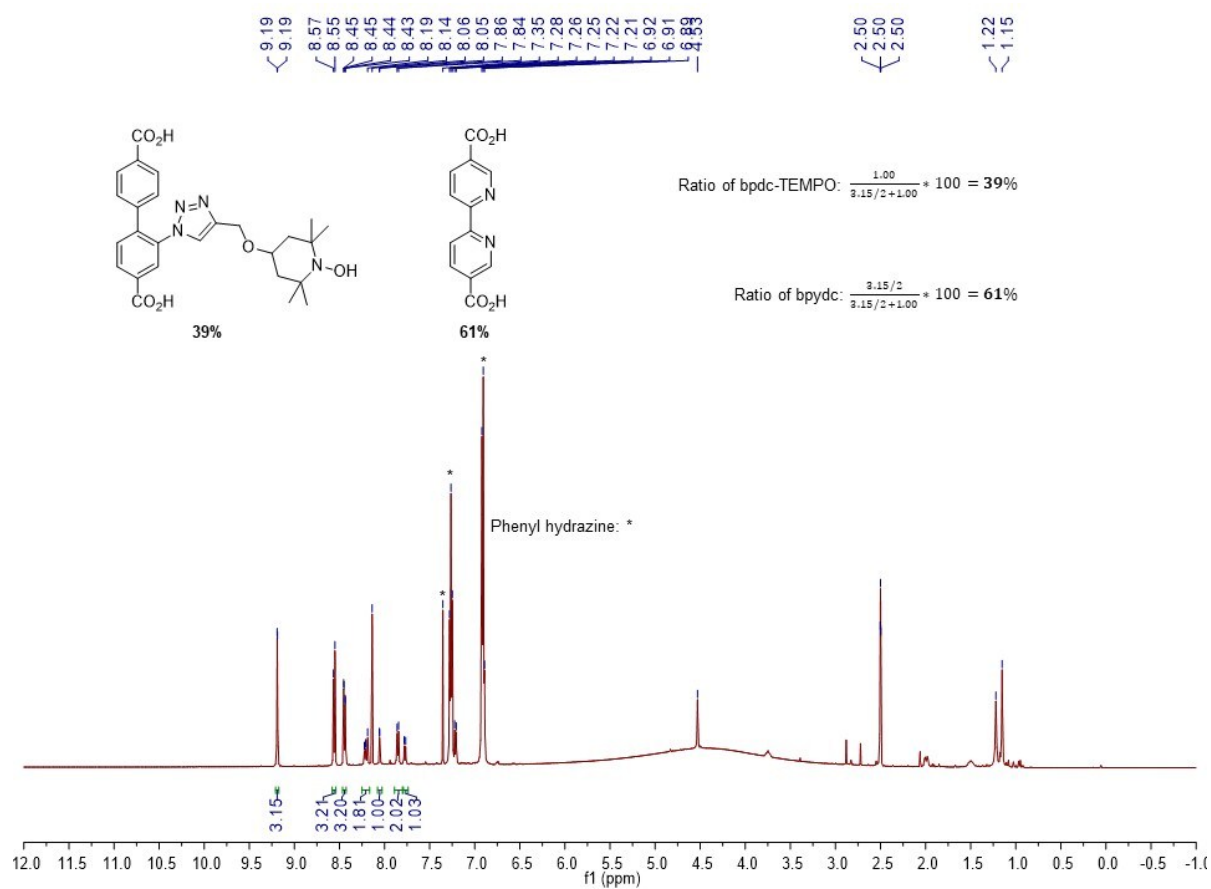

**Fig. S10**  $^1\text{H}$  NMR spectra of UiO-67-(bpy-Eu&TEMPO) after acid digestion.

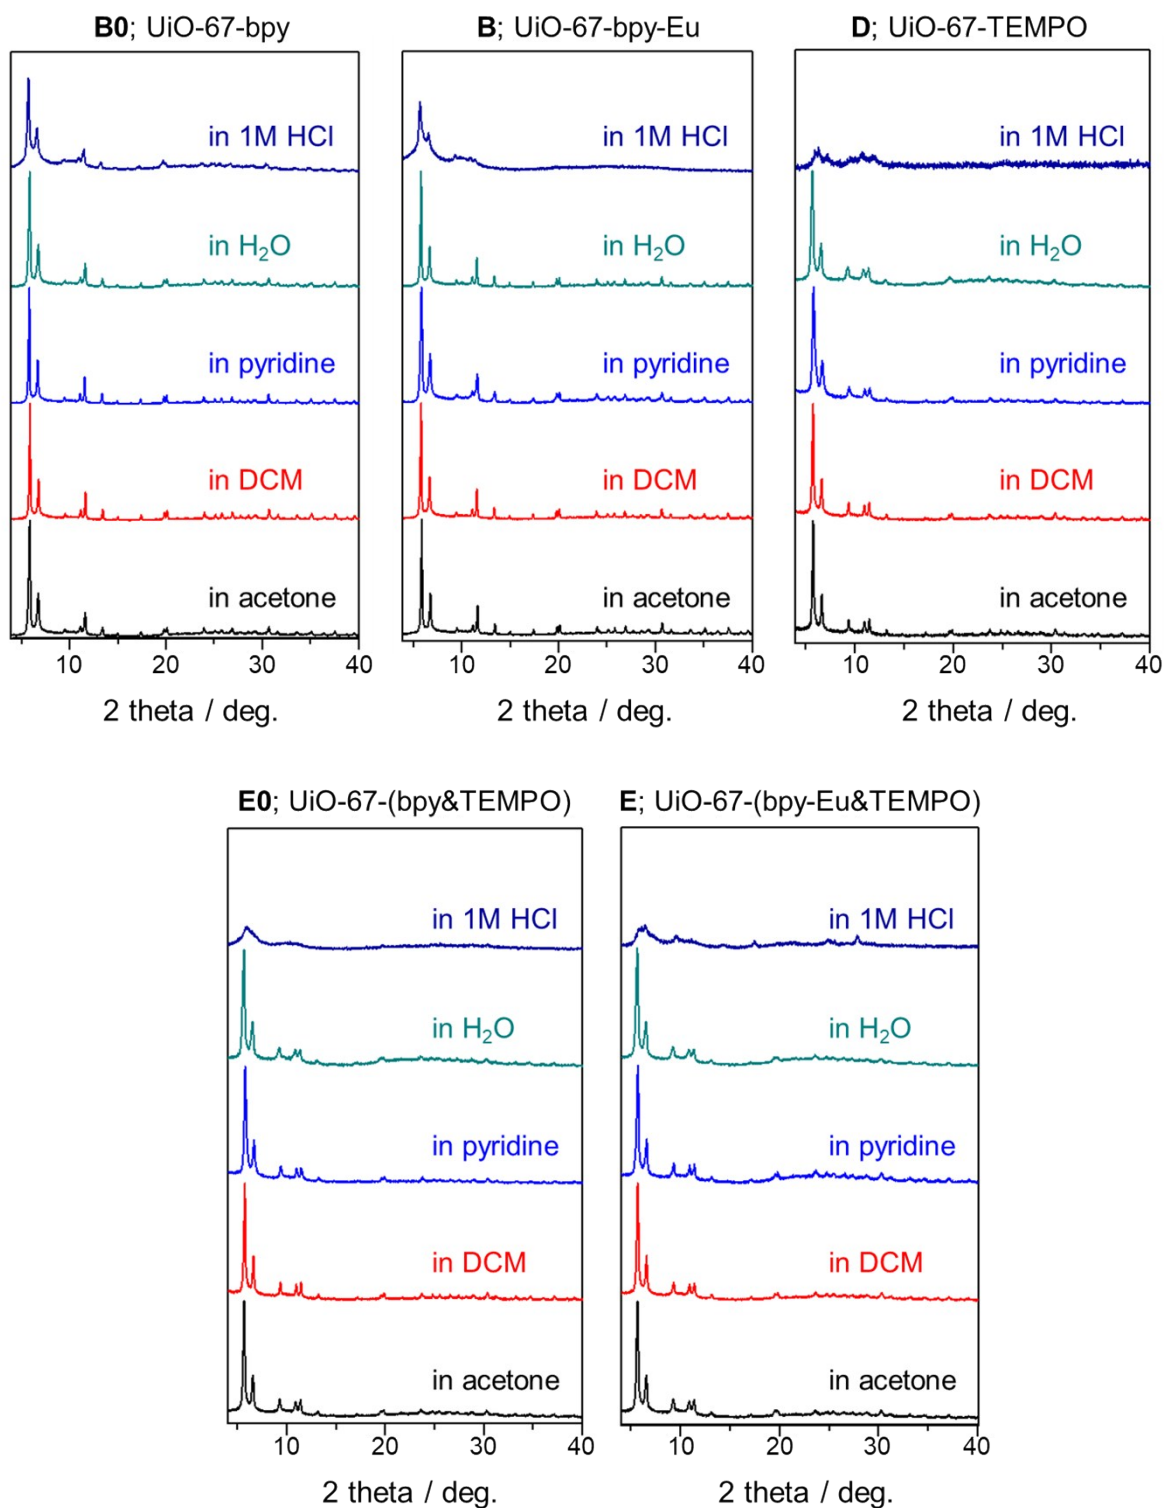

**Fig. S11** PXRD patterns of UiO-67-bpy (**B0**), UiO-67-bpy-Eu (**B**), UiO-67-TEMPO (**D**), UiO-67-(bpy&TEMPO) (**E0**), and UiO-67-(bpy-Eu&TEMPO) (**E**) after exposure to a variety of chemicals.

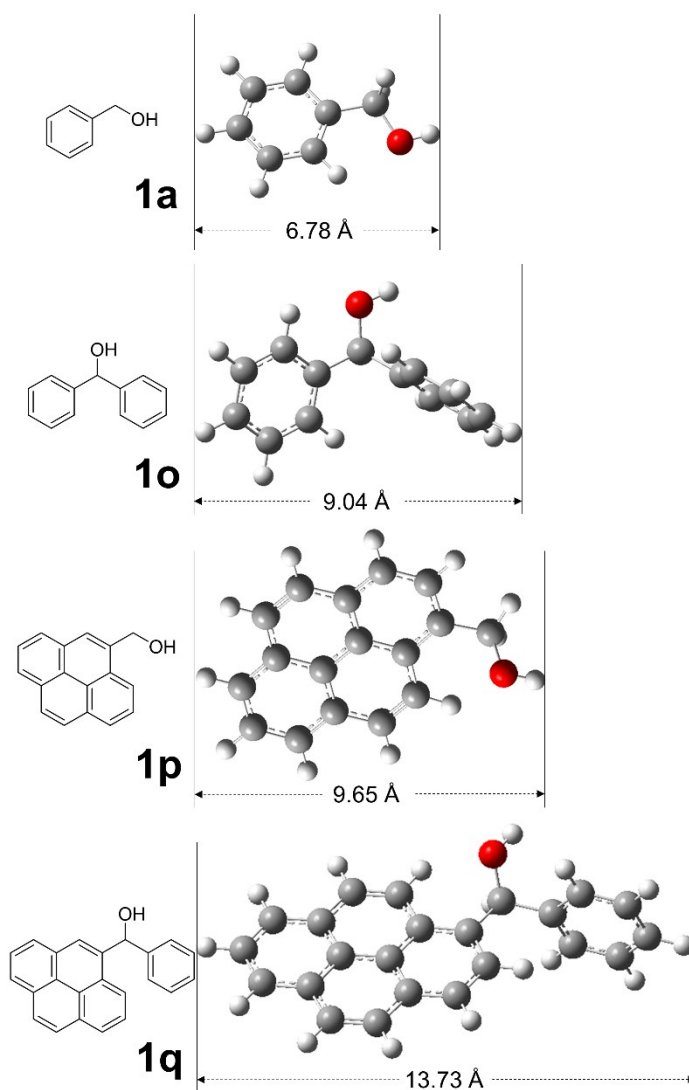

**Fig. S12** B3LYP/6-311G(d,p) optimized molecular geometry of substrates and molecular sizes.

**Scheme S1.** General mechanism for transition metal-catalyzed aerobic oxidation with TEMPO moiety

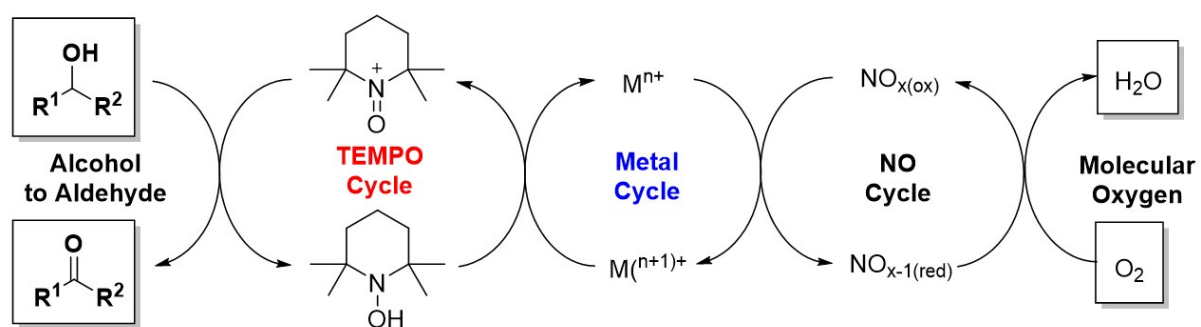

## References for the ESI

- S1 M. J. Frisch, G. W. Trucks, H. B. Schlegel, G. E. Scuseria, M. A. Robb, J. R. Cheeseman, G. Scalmani, V. Barone, B. Mennucci, G. A. Petersson, H. Nakatsuji, M. Caricato, X. Li, H. P. Hratchian, A. F. Izmaylov, J. Bloino, G. Zheng, J. L. Sonnenberg, M. Hada, M. Ehara, K. Toyota, R. Fukuda, J. Hasegawa, M. Ishida, T. Nakajima, Y. Honda, O. Kitao, H. Nakai, T. Vreven, J. A. Montgomery, Jr., J. E. Peralta, F. Ogliaro, M. Bearpark, J. J. Heyd, E. Brothers, K. N. Kudin, V. N. Staroverov, T. Keith, R. Kobayashi, J. Normand, K. Raghavachari, A. Rendell, J. C. Burant, S. S. Iyengar, J. Tomasi, M. Cossi, N. Rega, J. M. Millam, M. Klene, J. E. Knox, J. B. Cross, V. Bakken, C. Adamo, J. Jaramillo, R. Gomperts, R. E. Stratmann, O. Yazyev, A. J. Austin, R. Cammi, C. Pomelli, J. W. Ochterski, R. L. Martin, K. Morokuma, V. G. Zakrzewski, G. A. Voth, P. Salvador, J. J. Dannenberg, S. Dapprich, A. D. Daniels, O. Farkas, J. B. Foresman, J. V. Ortiz, J. Cioslowski, and D. J. Fox, Gaussian 09, Revision C.01; Gaussian, Inc.: Wallingford, CT, **2010**.
- S2 T. Zhang, K. Manna and W. Lin *J. Am. Chem. Soc.* **2016**, 138, 3241.
- S3 S. Kim, J. Lee, S. Jeoung, H. R. Moon and M. Kim, *Chem. Eur. J.* **2020**, DOI:10.1002/chem.202000933.
- S4 S. Kim, Y. Kim, H. Jin, M. H. Park, Y. Kim, K. M. Lee and M. Kim *Adv. Synth. Catal.* **2019**, 361, 1259.



## *Appendix*

*Spectral copies of  $^1\text{H}$  and  $^{13}\text{C}$  NMR of the  
obtained compounds*

# **Benzaldehyde (2a)**

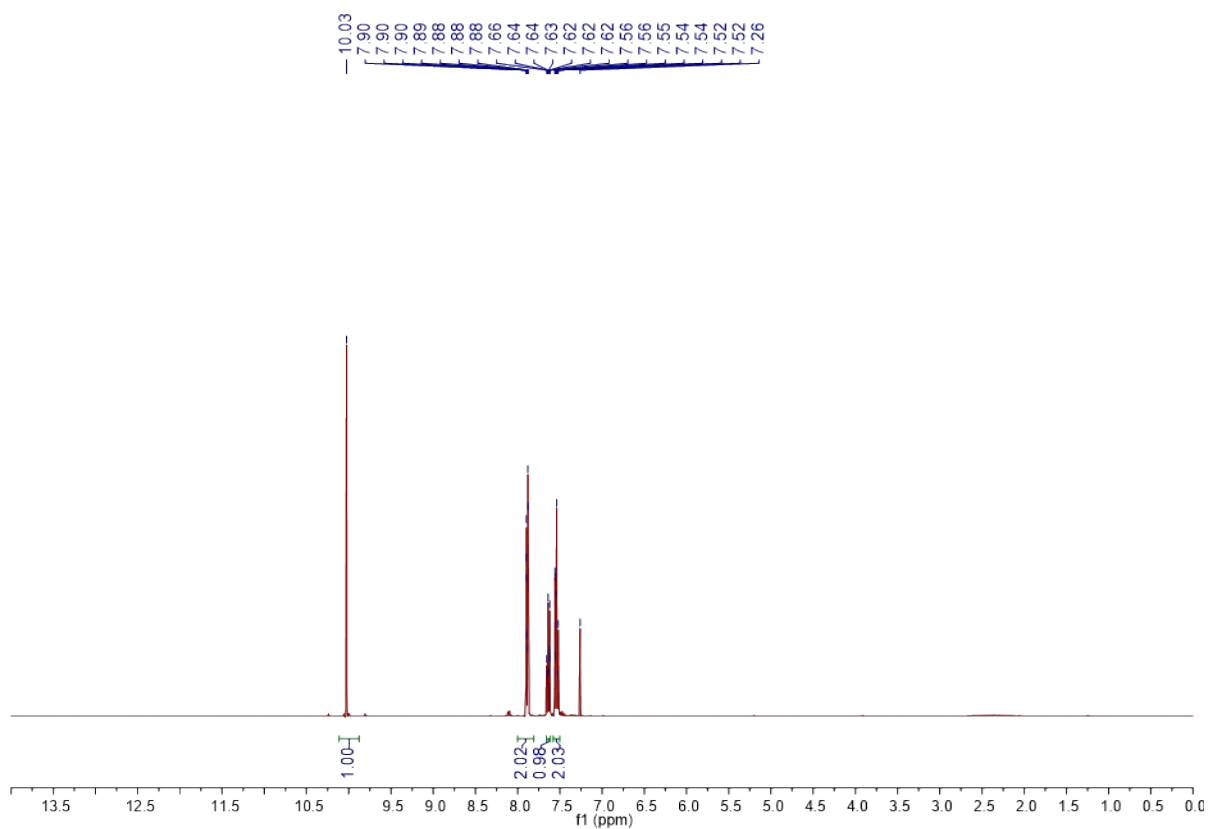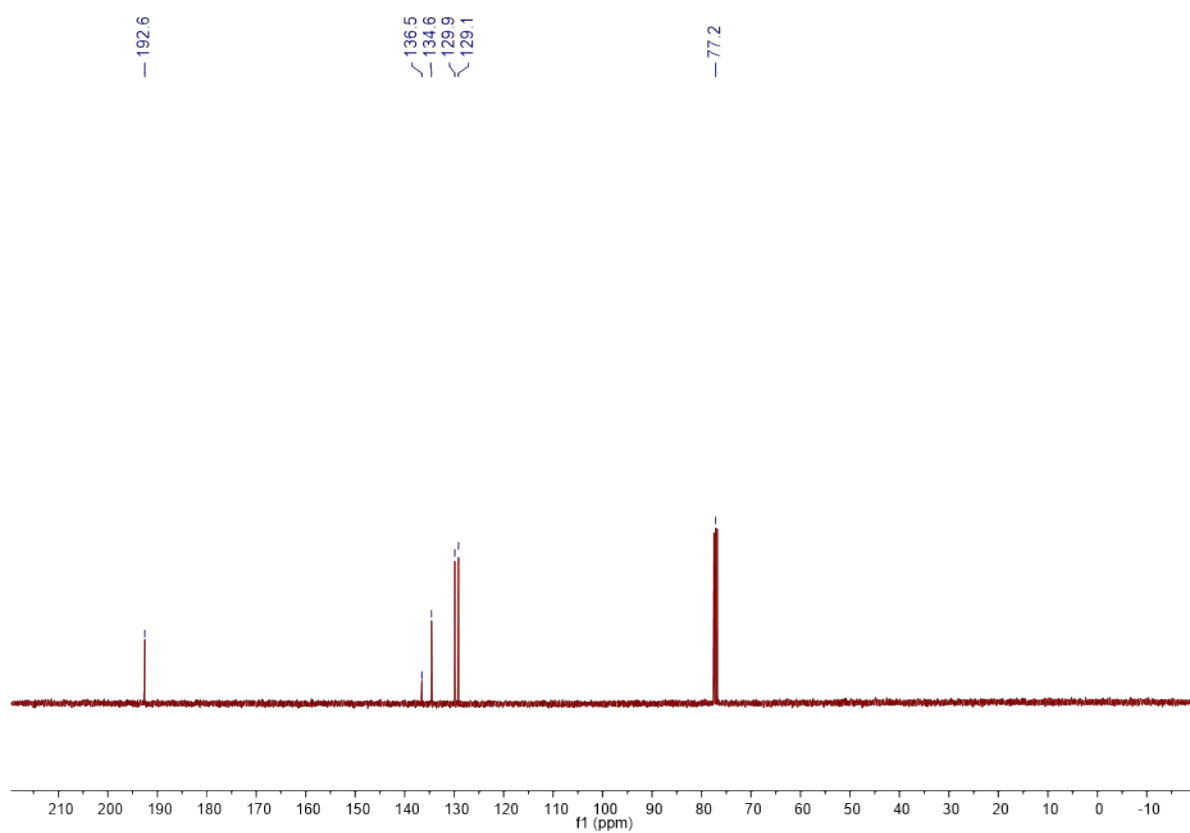

# 4-Nitrobenzaldehyde (2b)

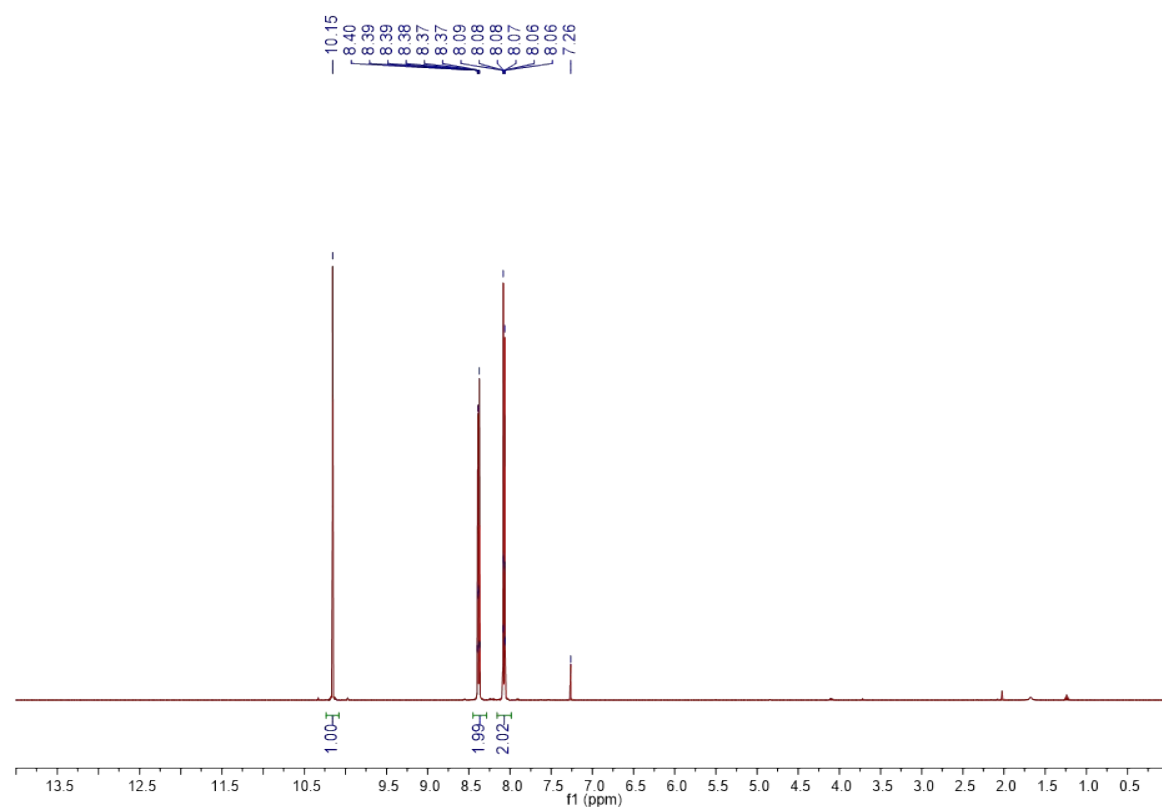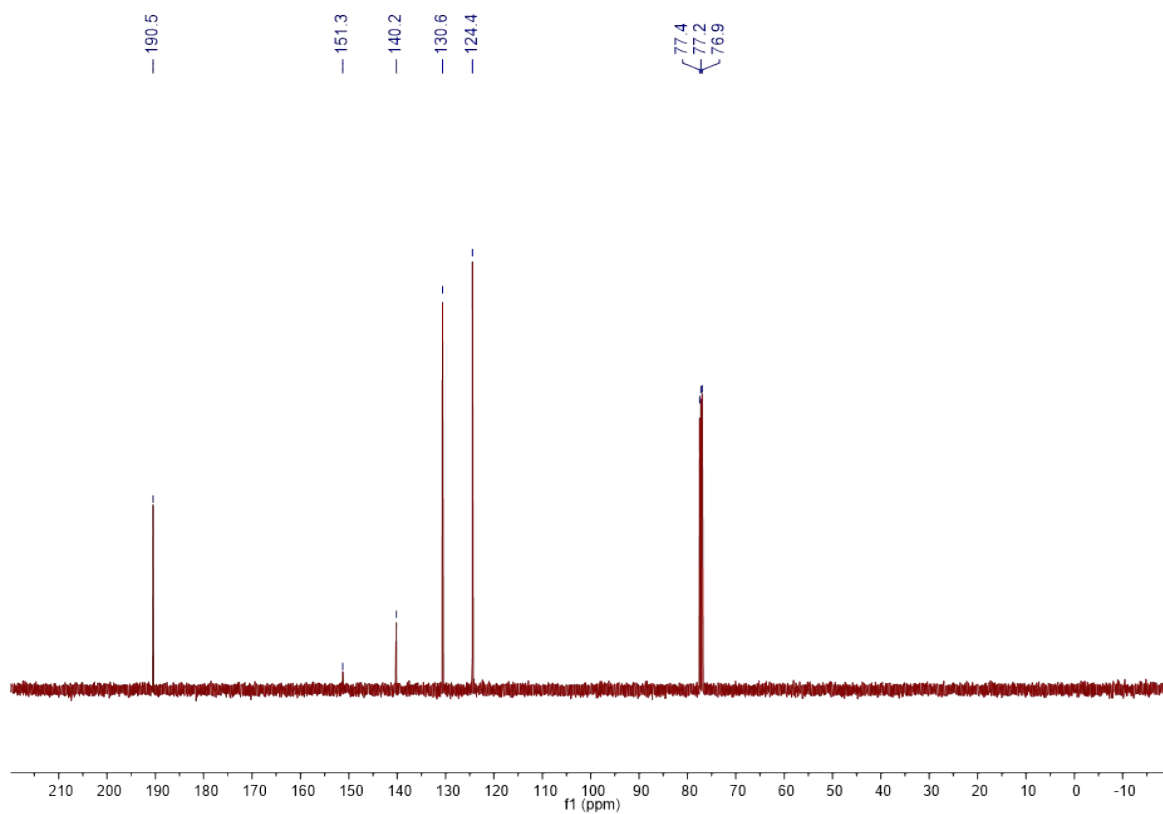

# 4-Bromobenzaldehyde (2c)

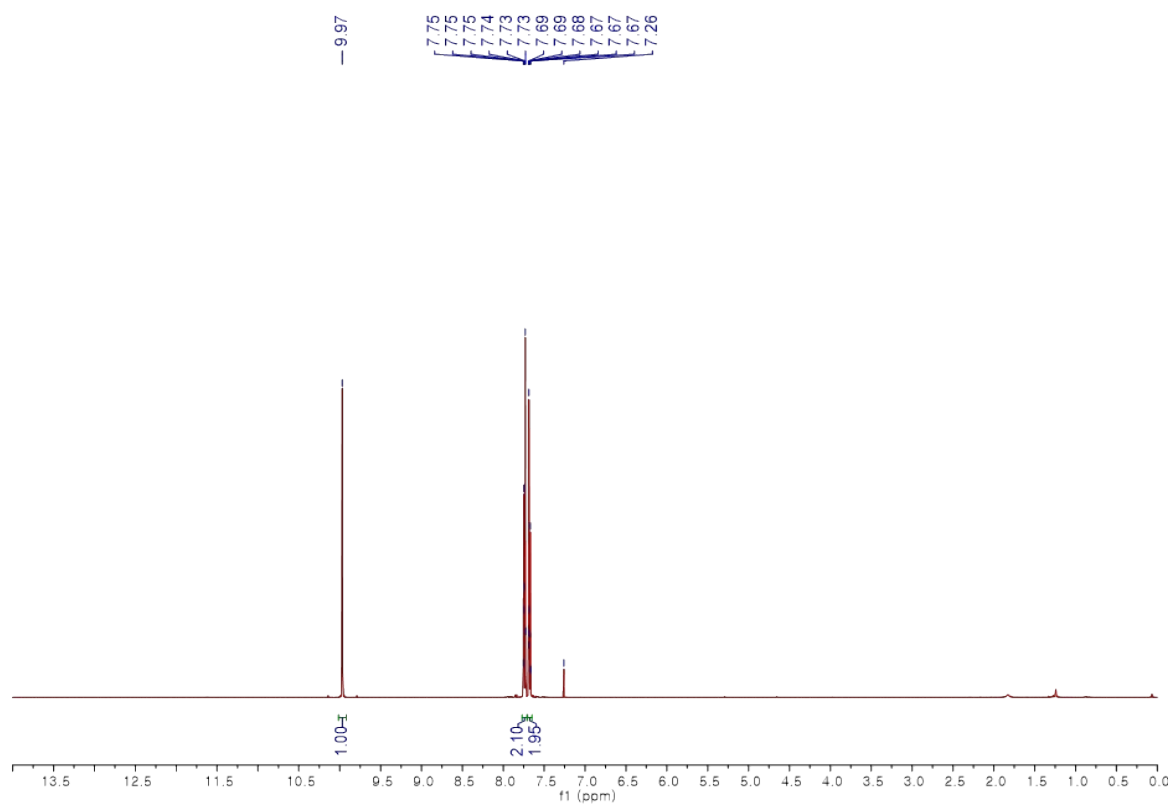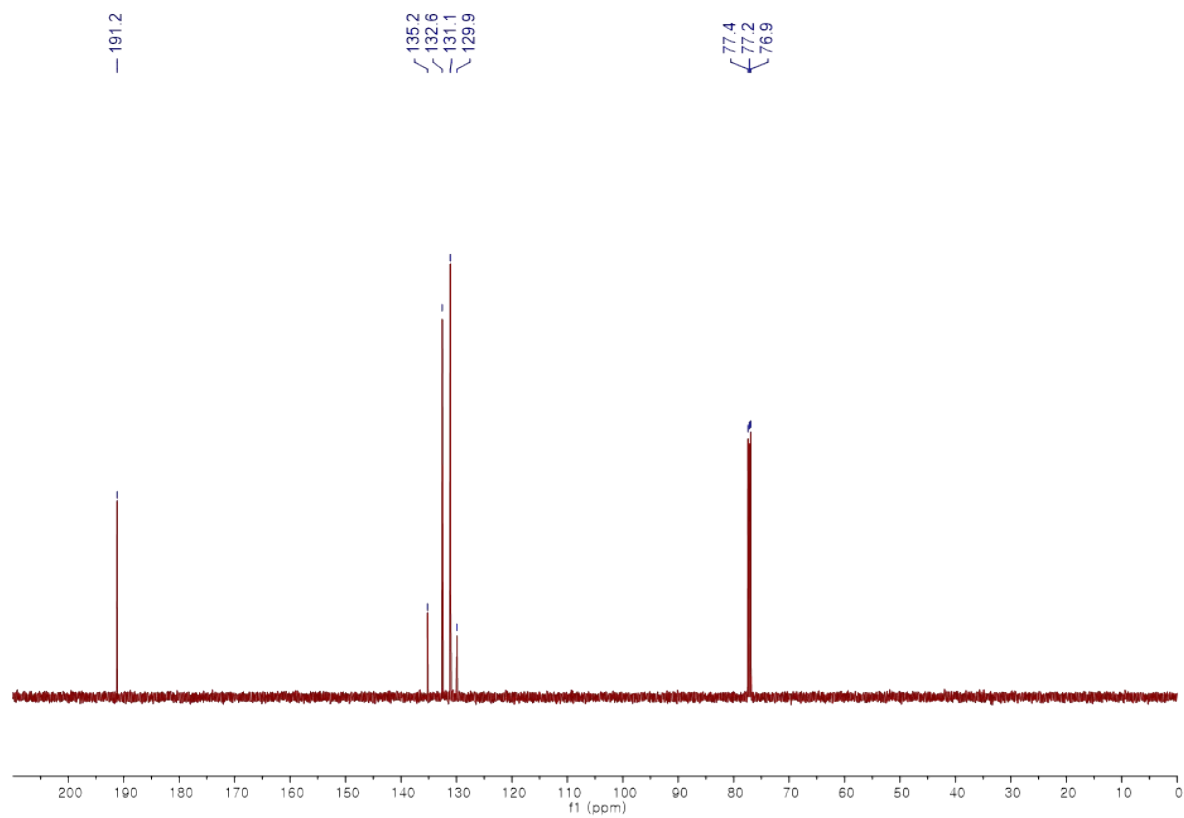

# 4-Chlorobenzaldehyde (2d)

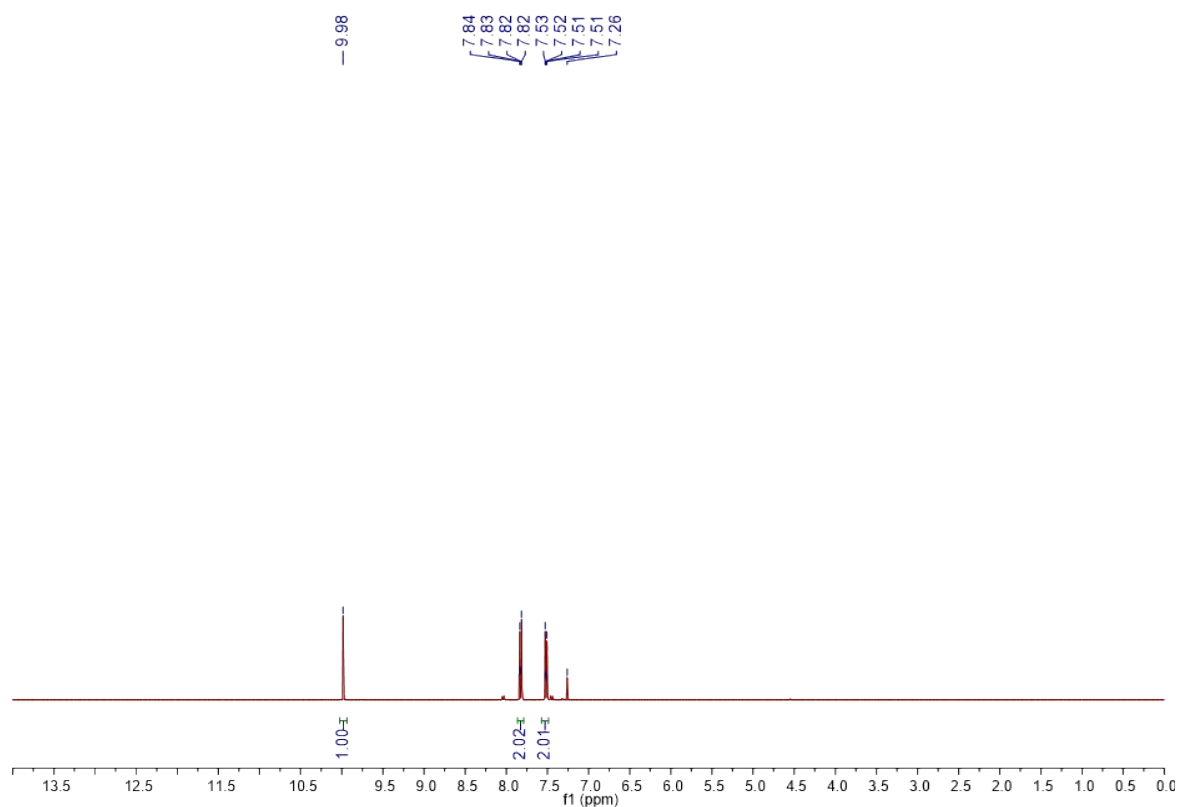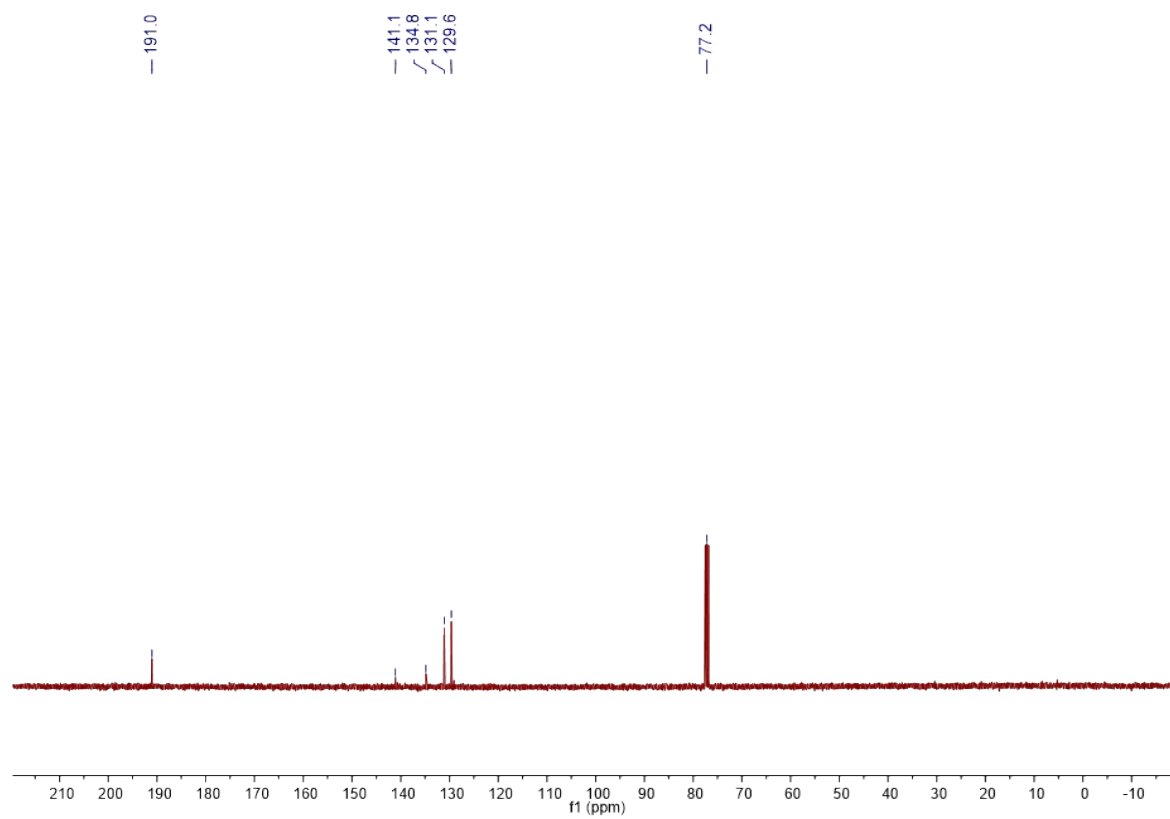

### 3-Chlorobenzaldehyde (2e)

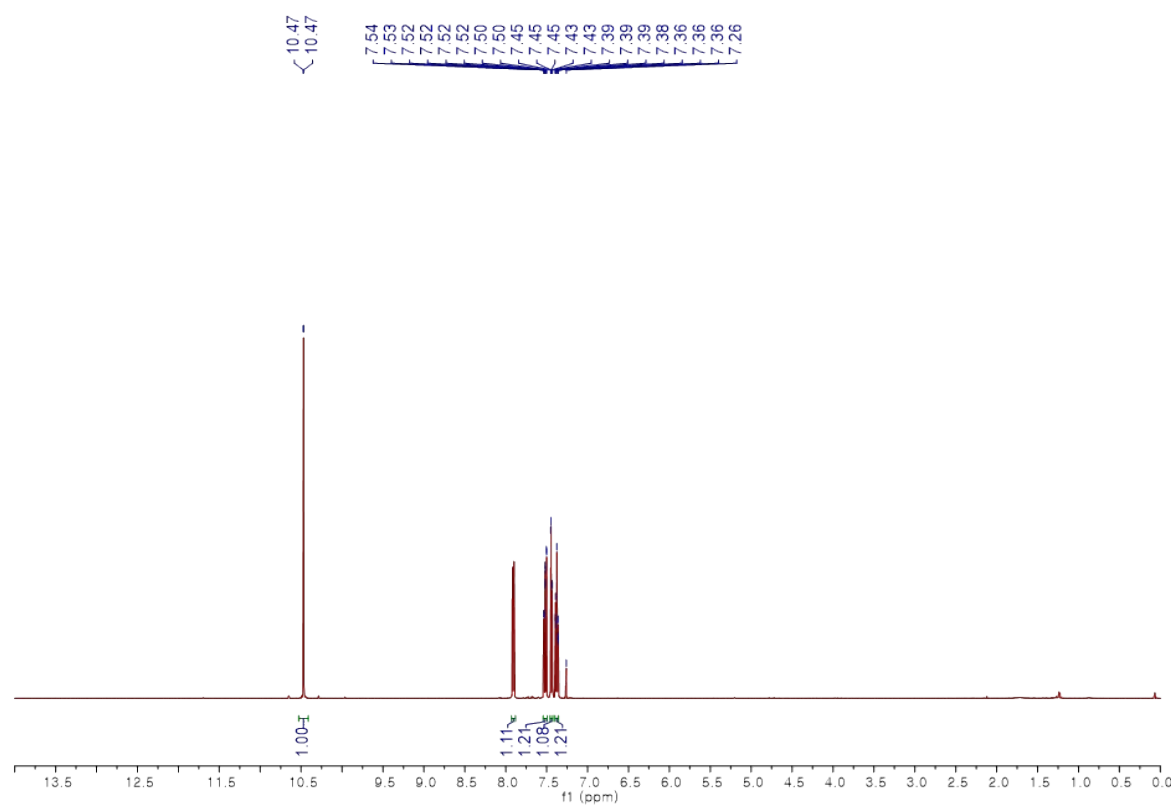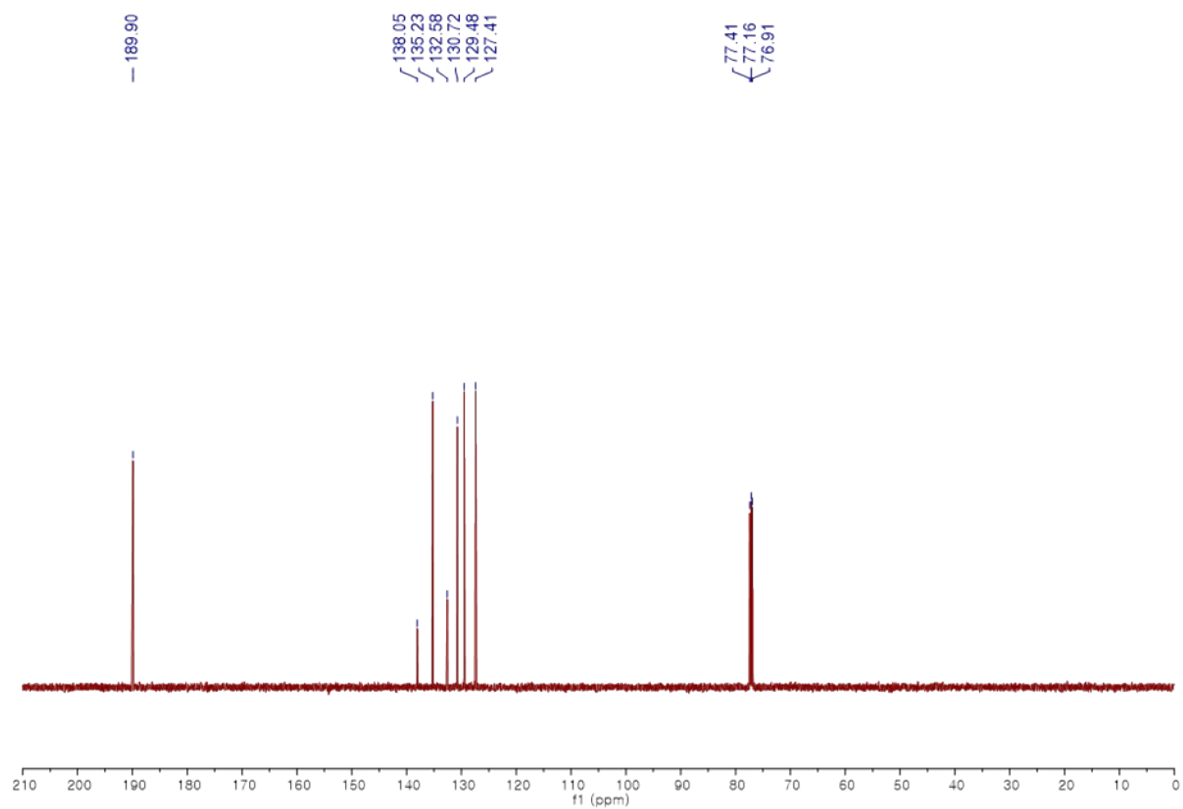

## 2-Chlorobenzaldehyde (2f)

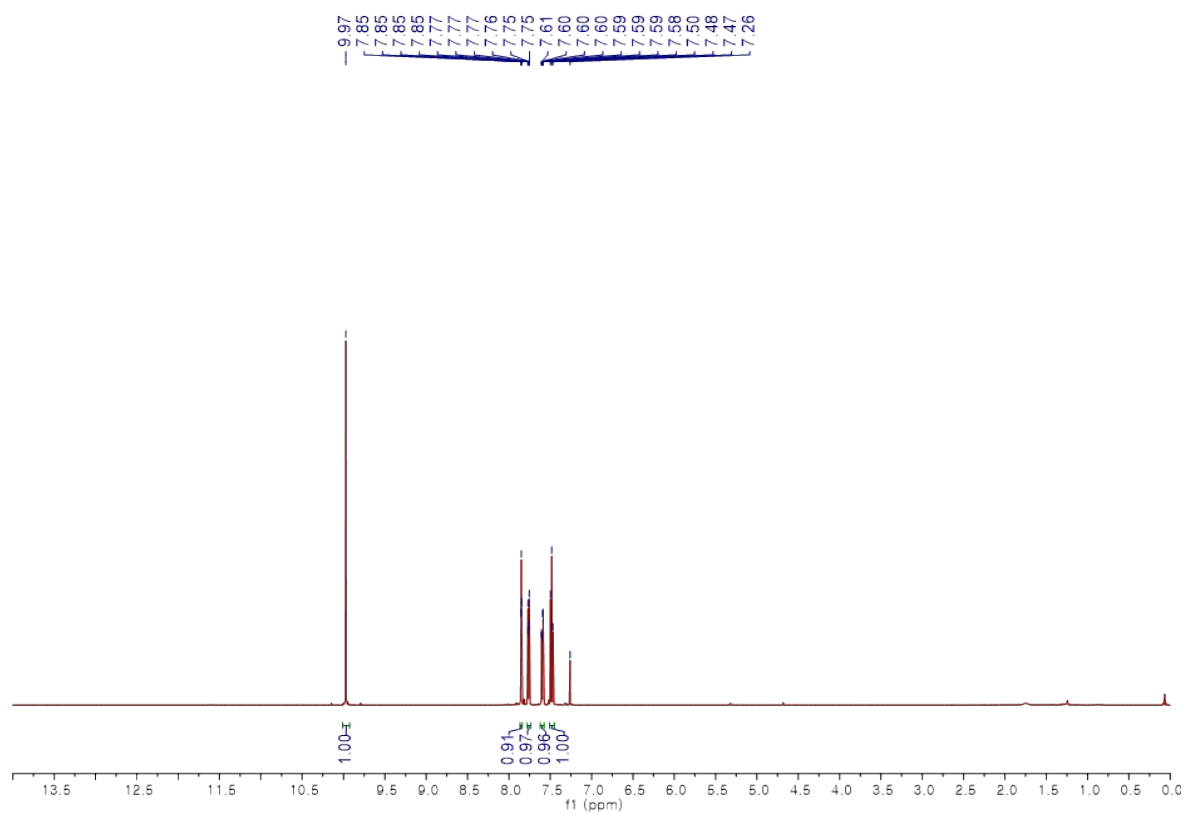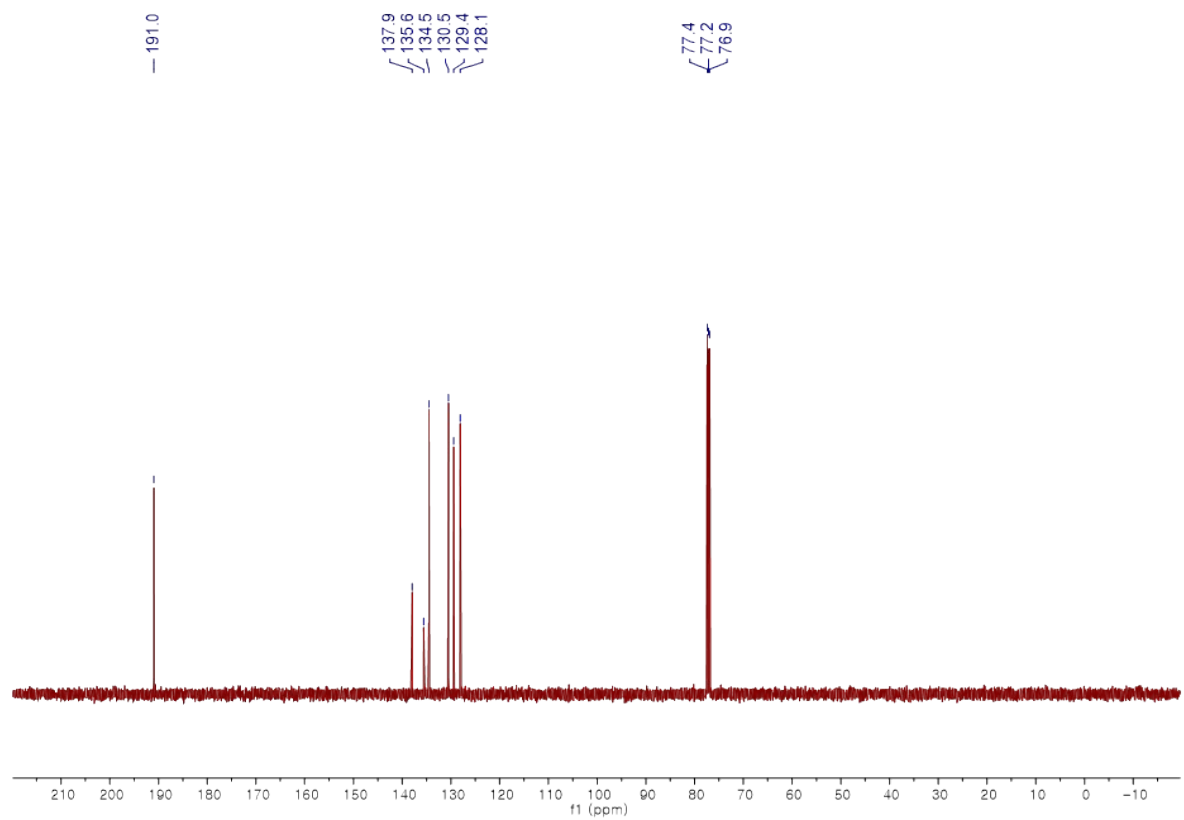

# 4-Methylbenzaldehyde (2g)

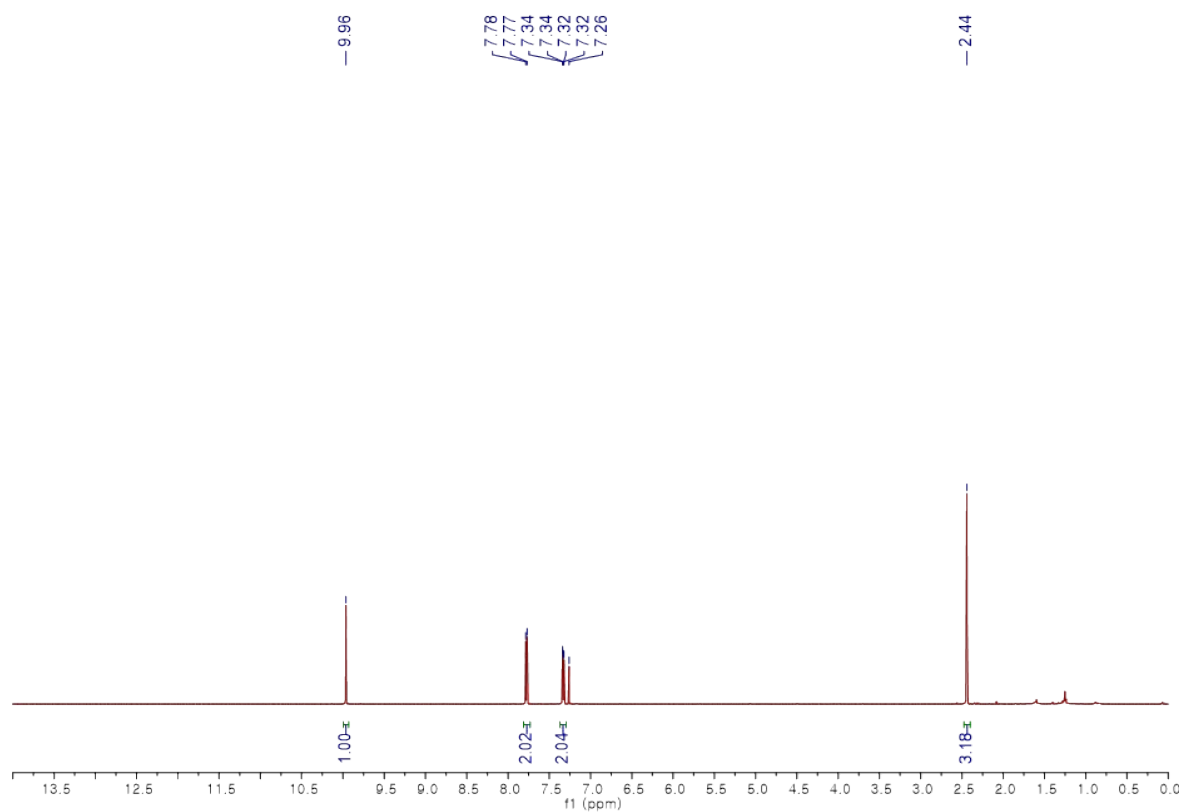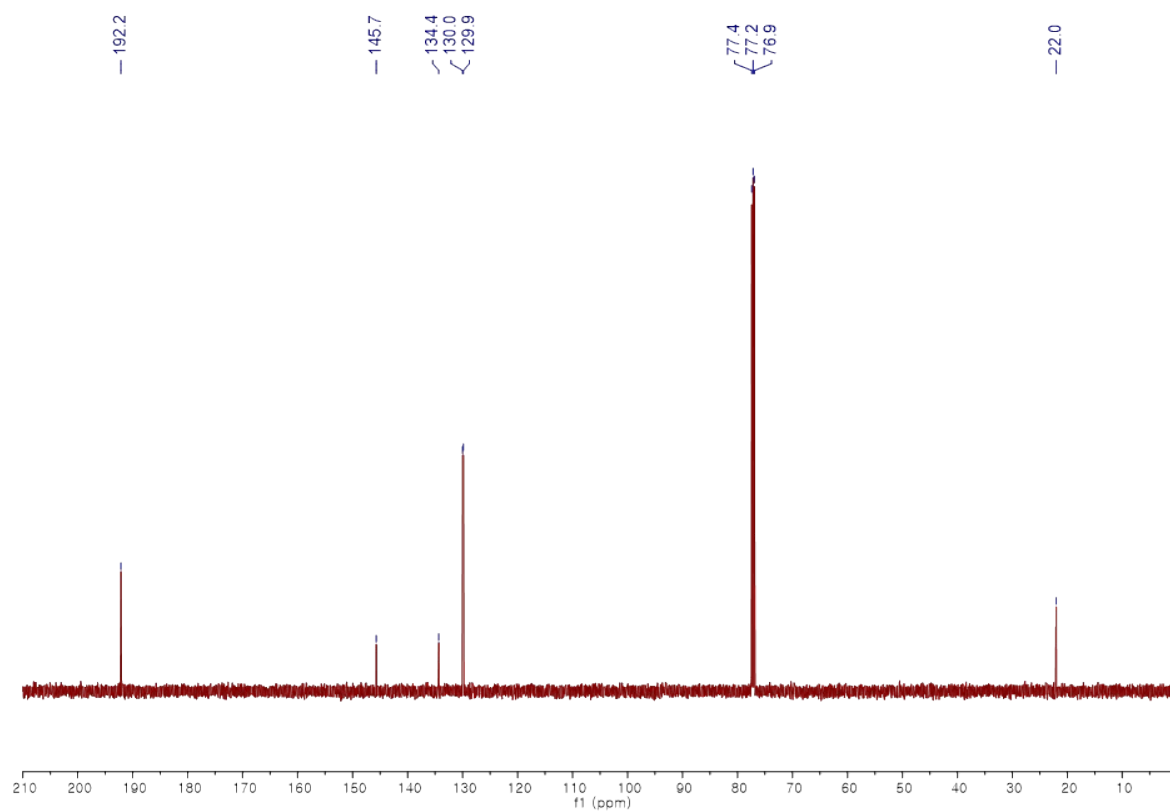



# 4-Methoxybenzaldehyde (2h)

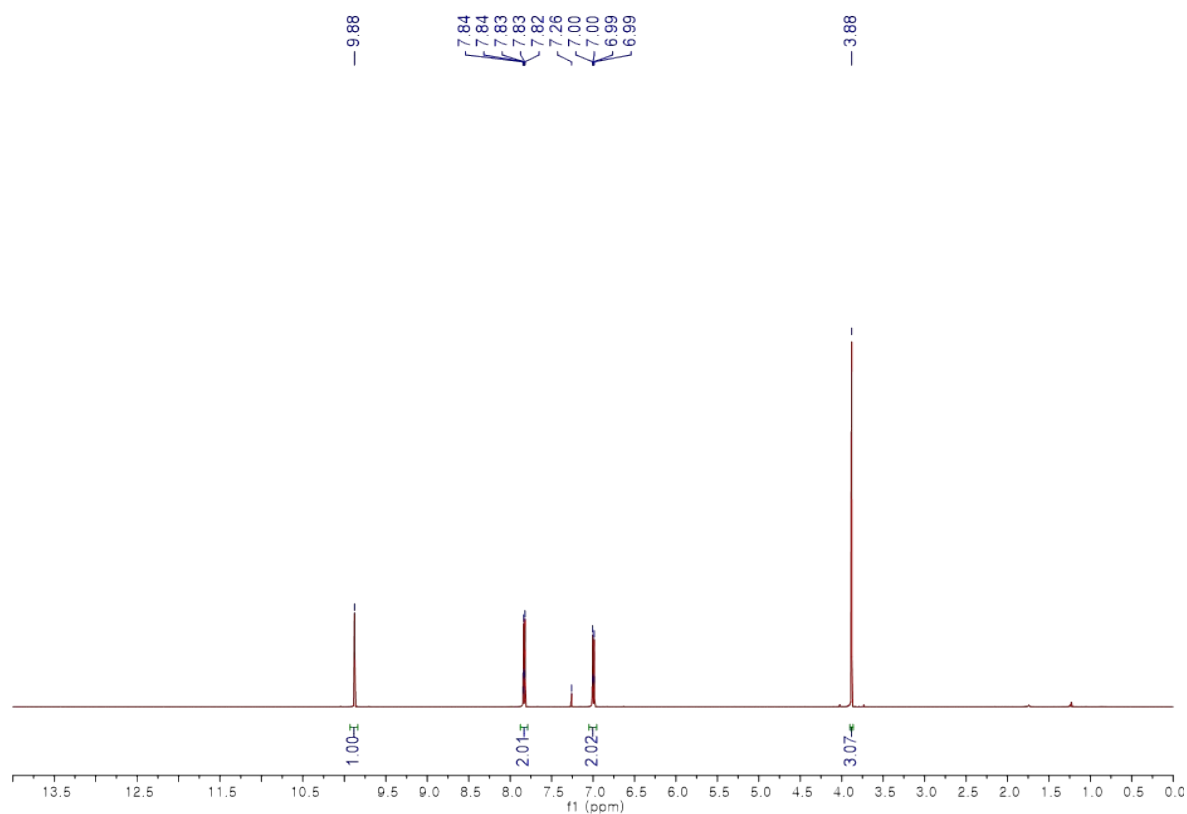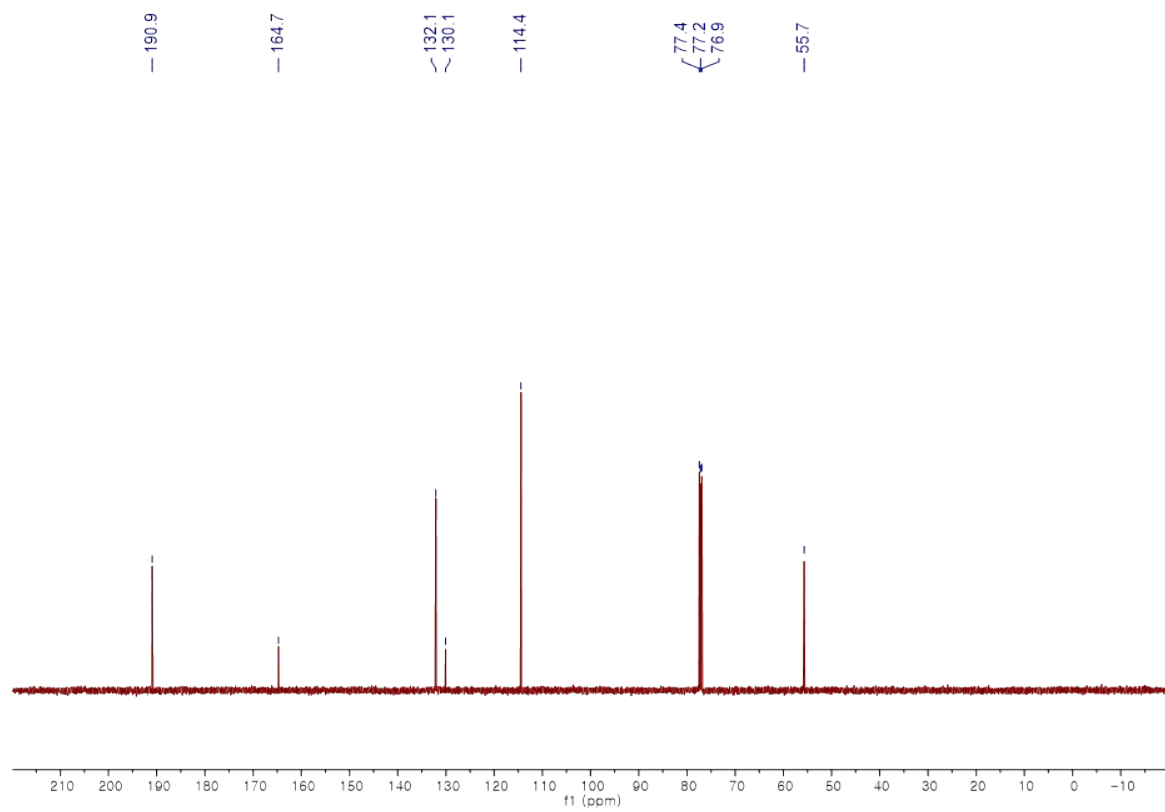

### 3-Methoxybenzaldehyde (2i)

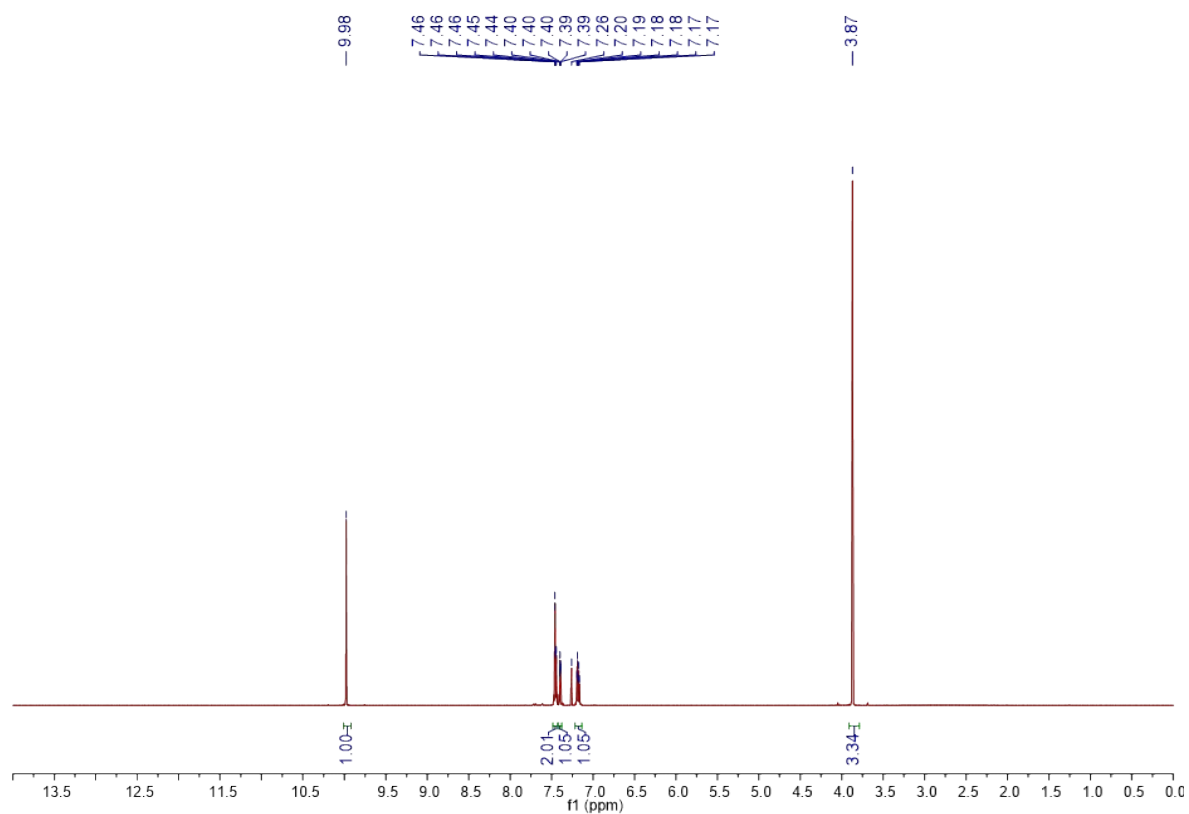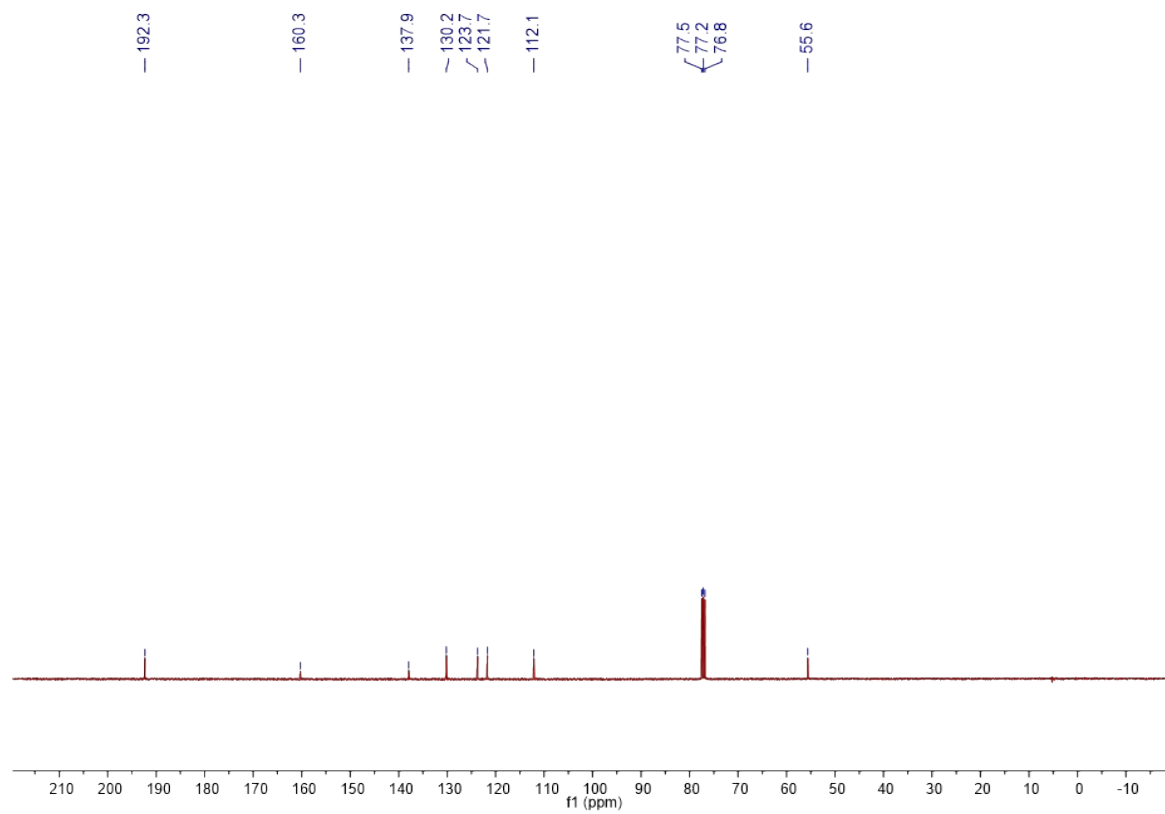

## 2-Methoxybenzaldehyde (2j)

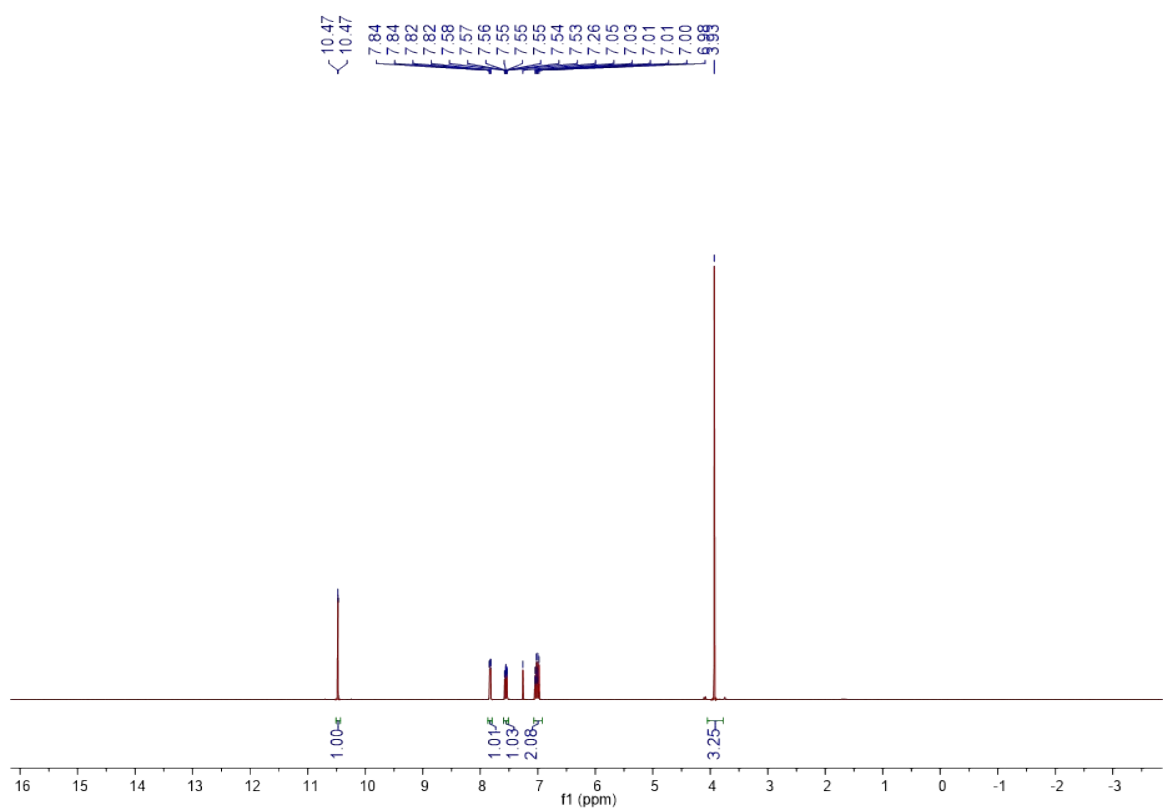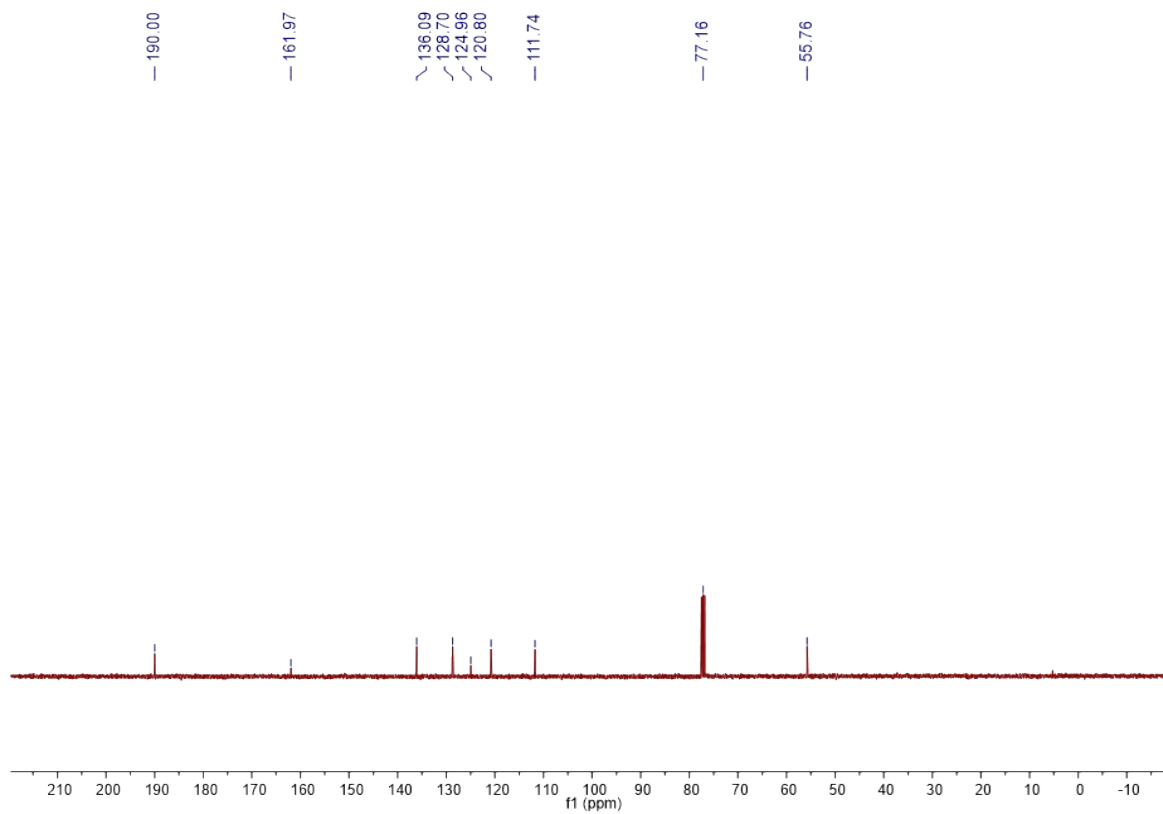

# 2-Thiophenecarboxaldehyde (2k)

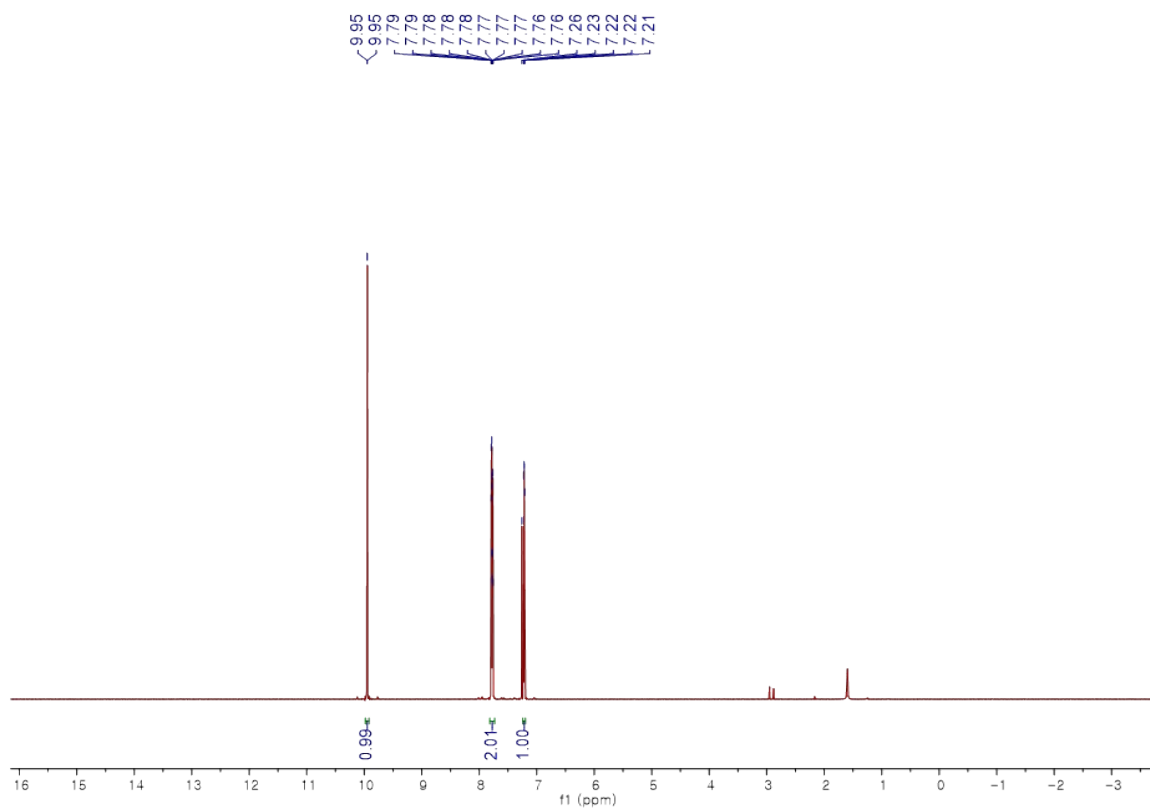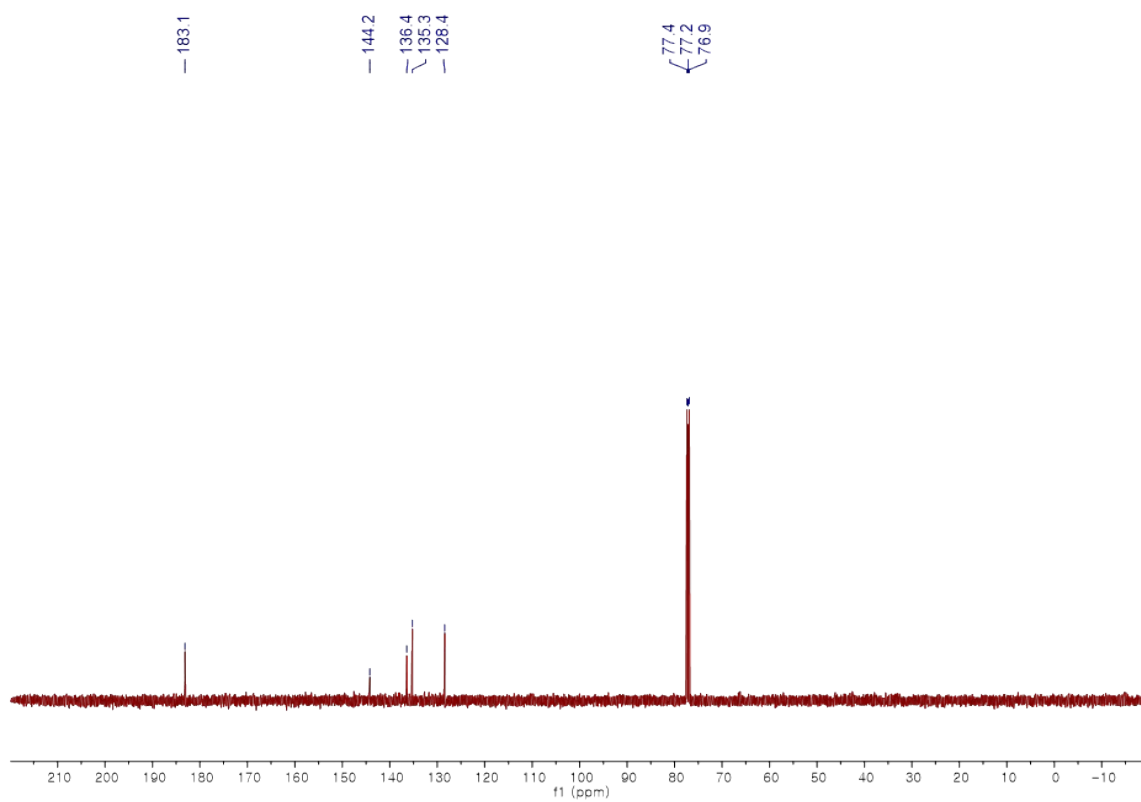

### 3-Thiophenecarboxaldehyde (2I)

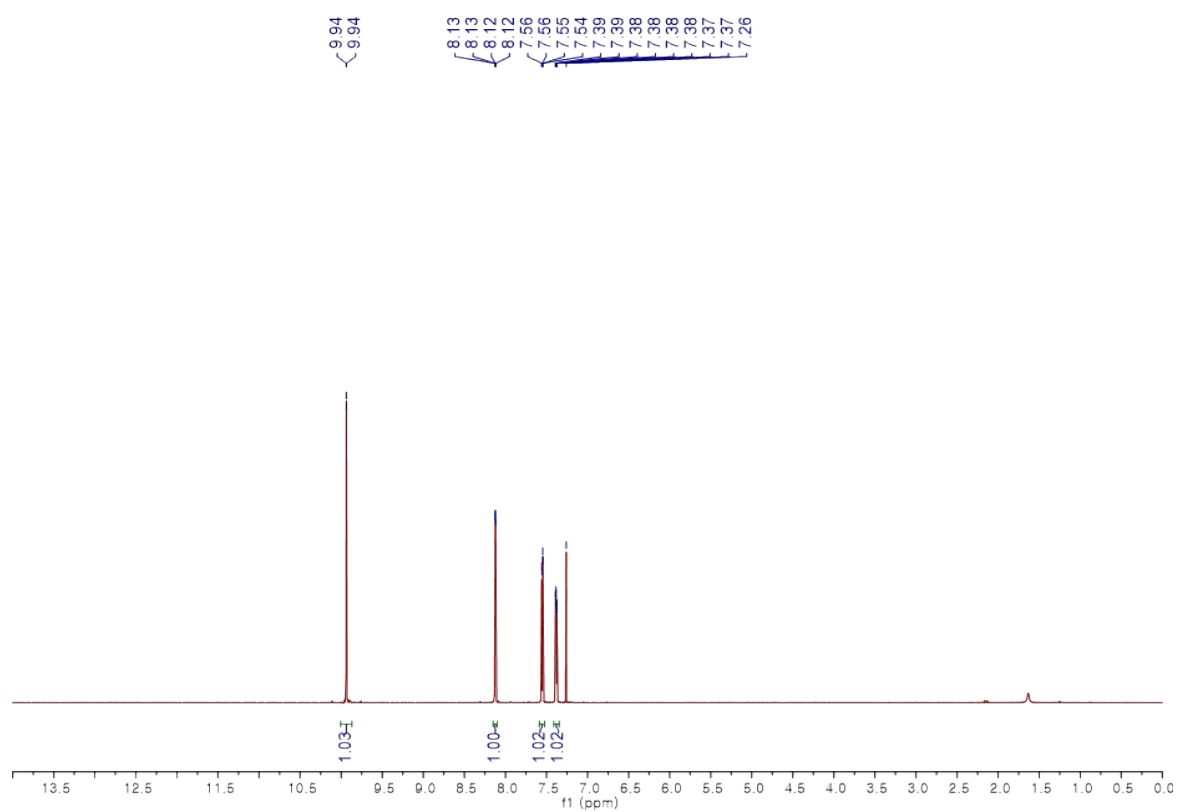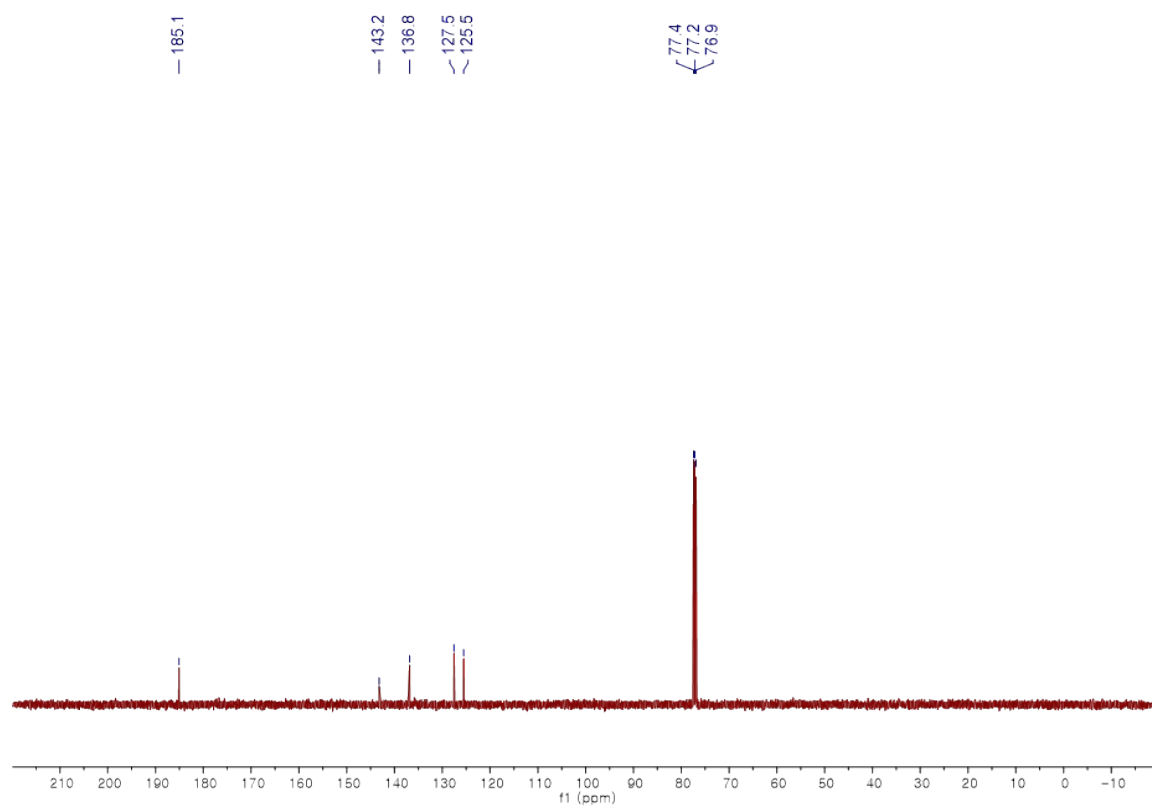

# 1-Hexanal (2m)

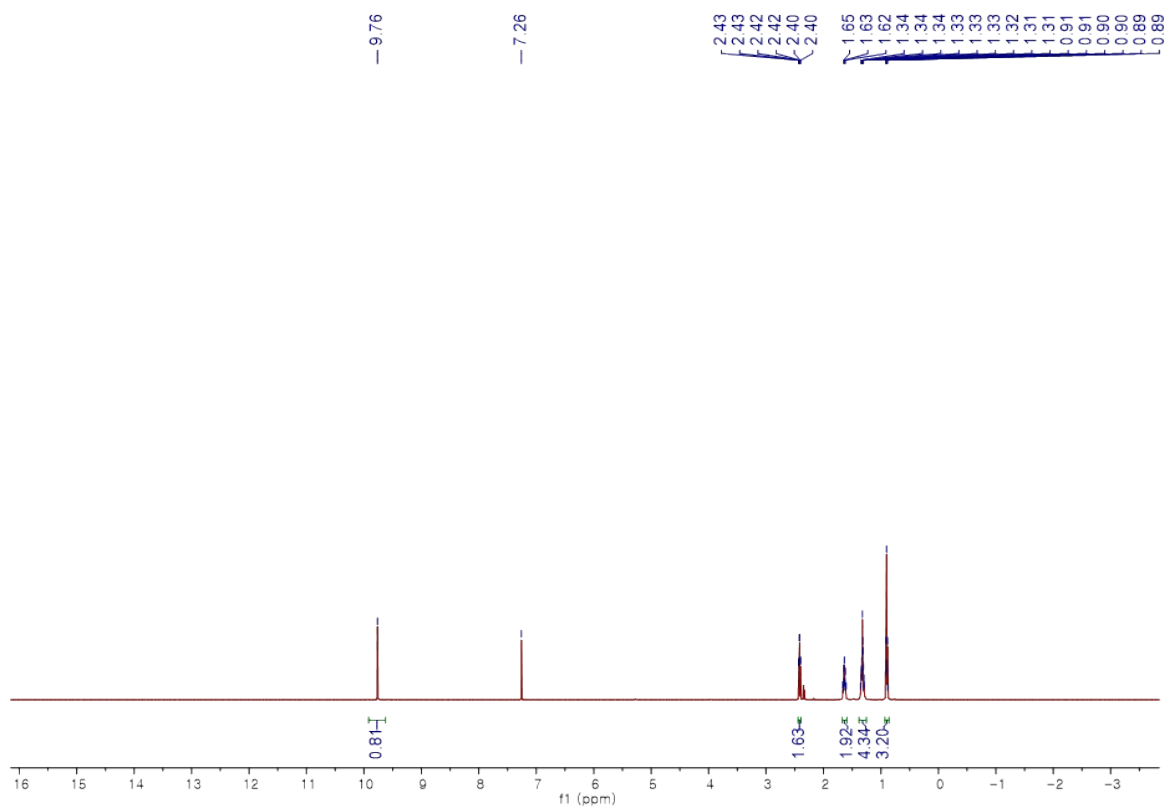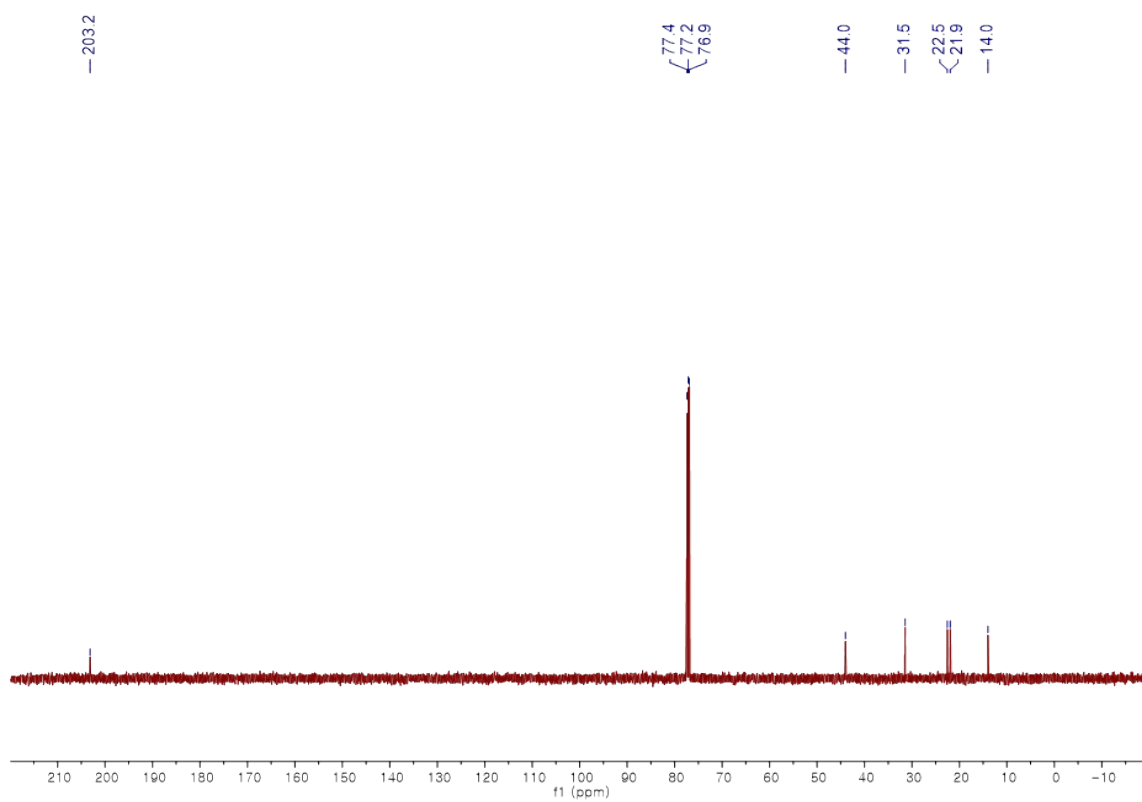

# 2-Heptanone (2n)

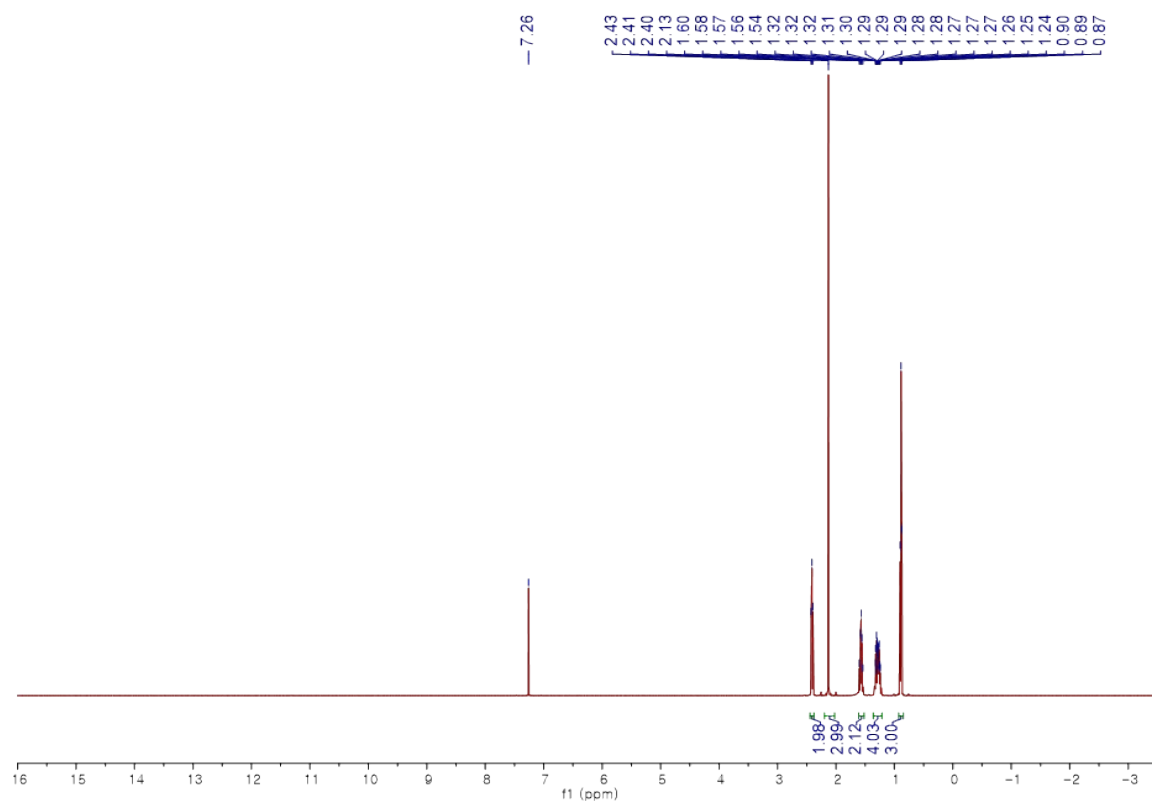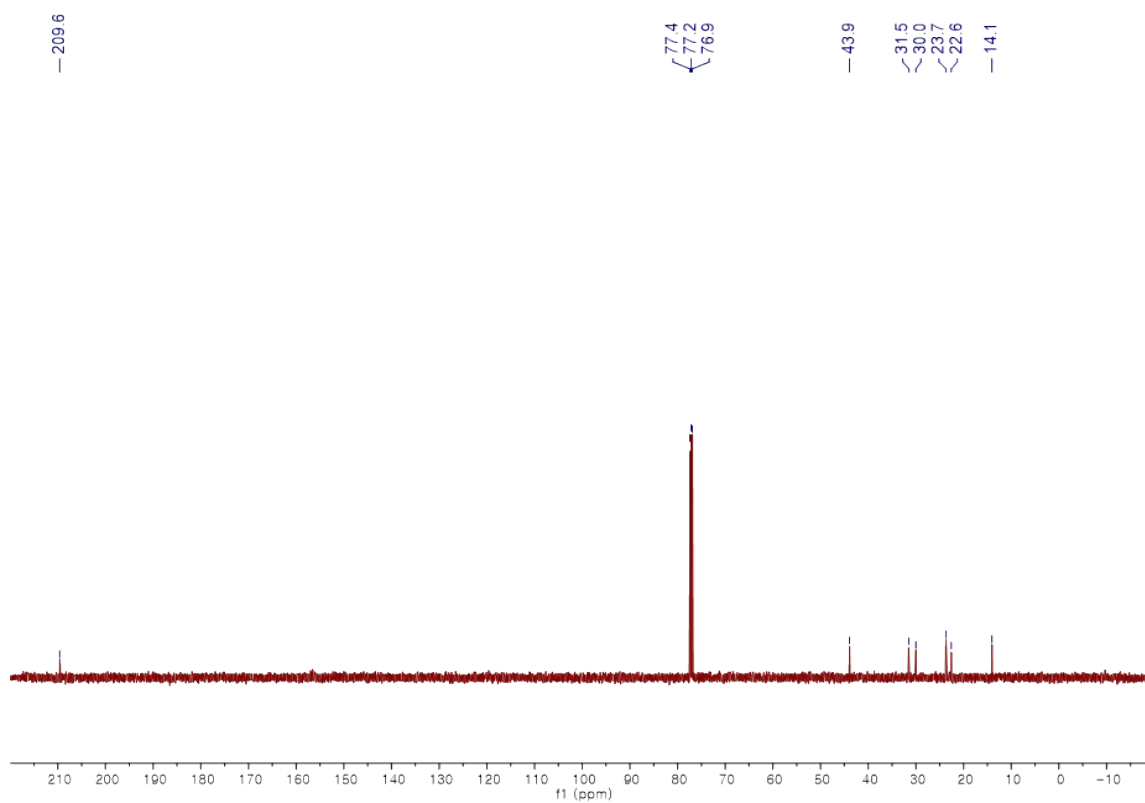

# Diphenyl ketone (2o)

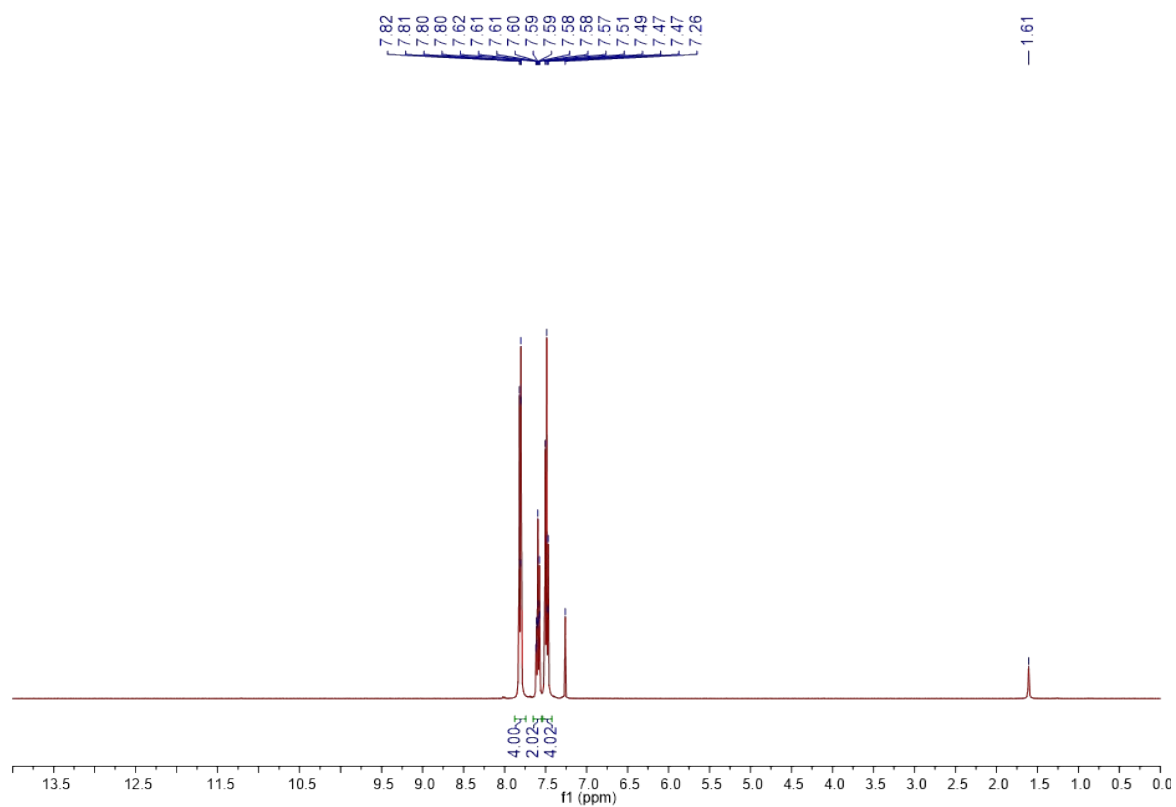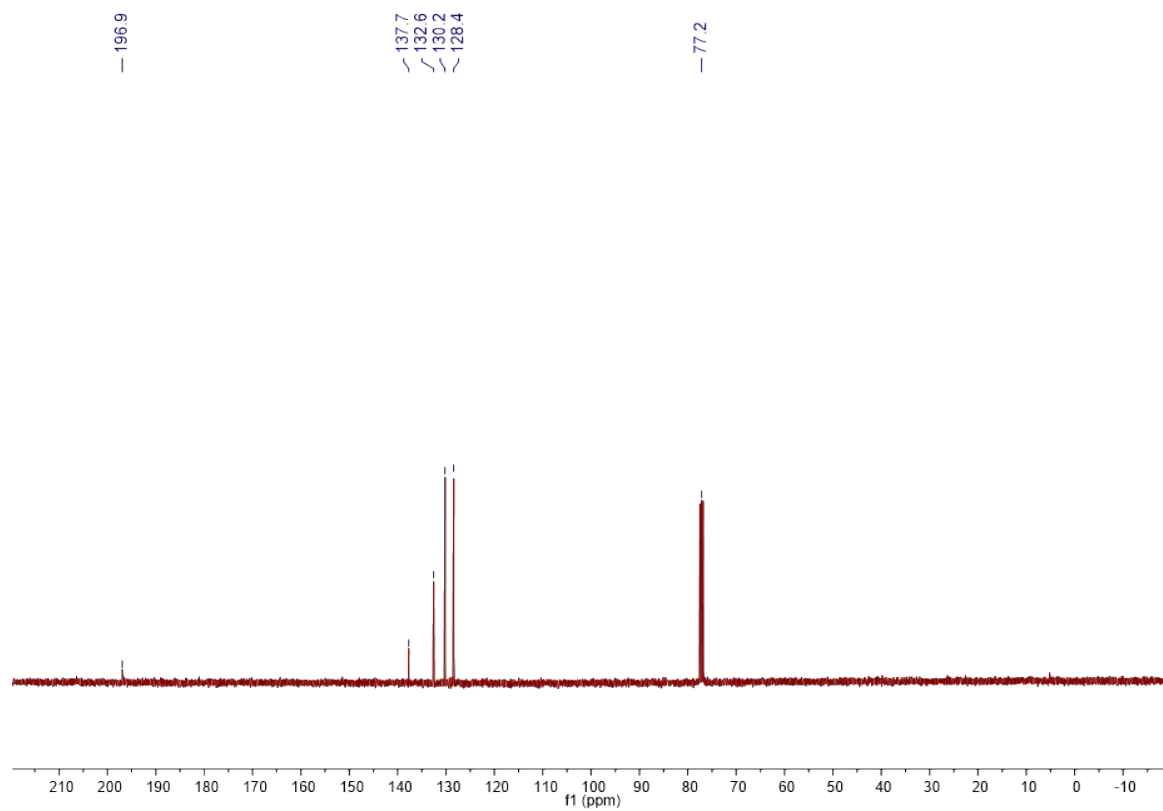



# 1-Pyrenylaldehyde (2p)

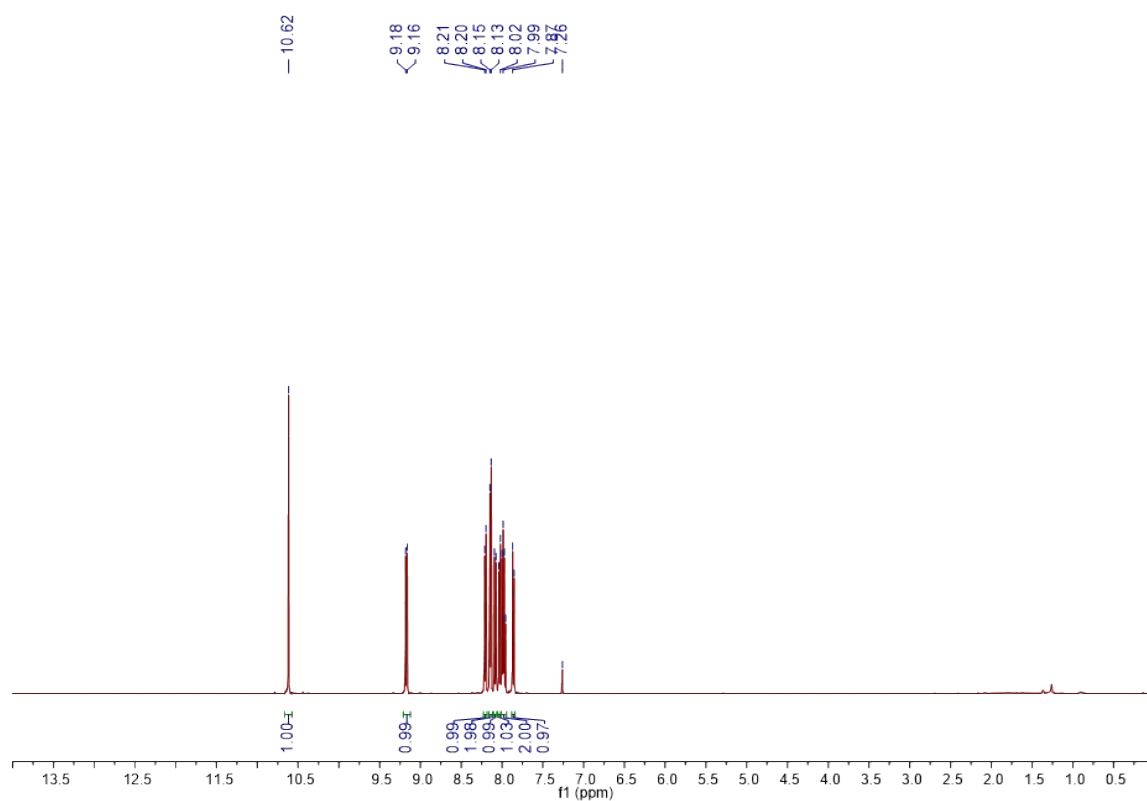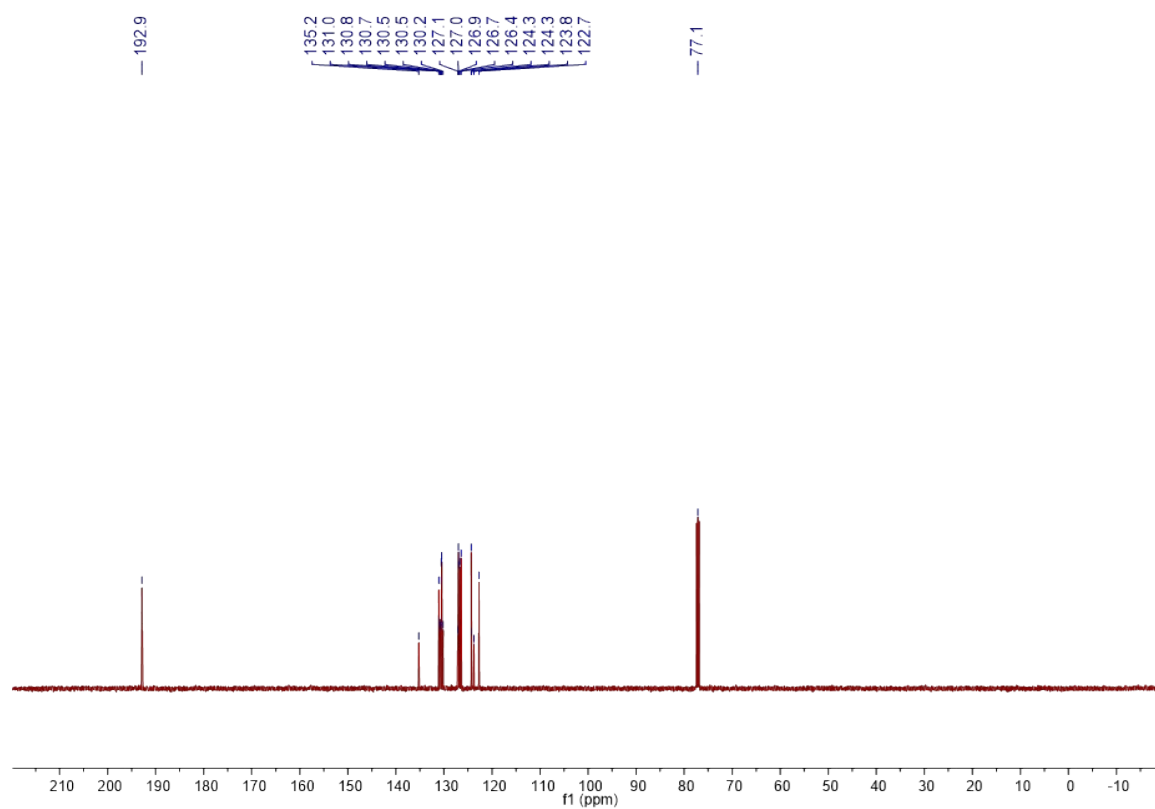

Phenyl pyrenyl ketone (2q)

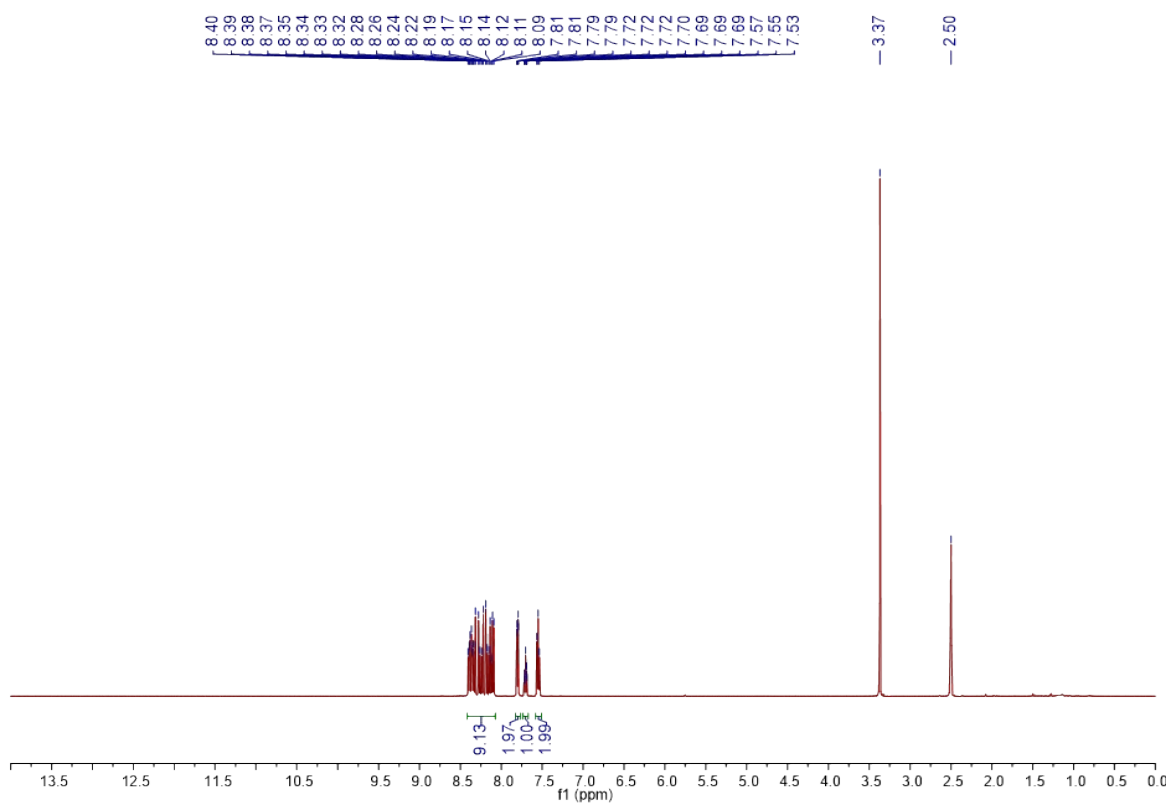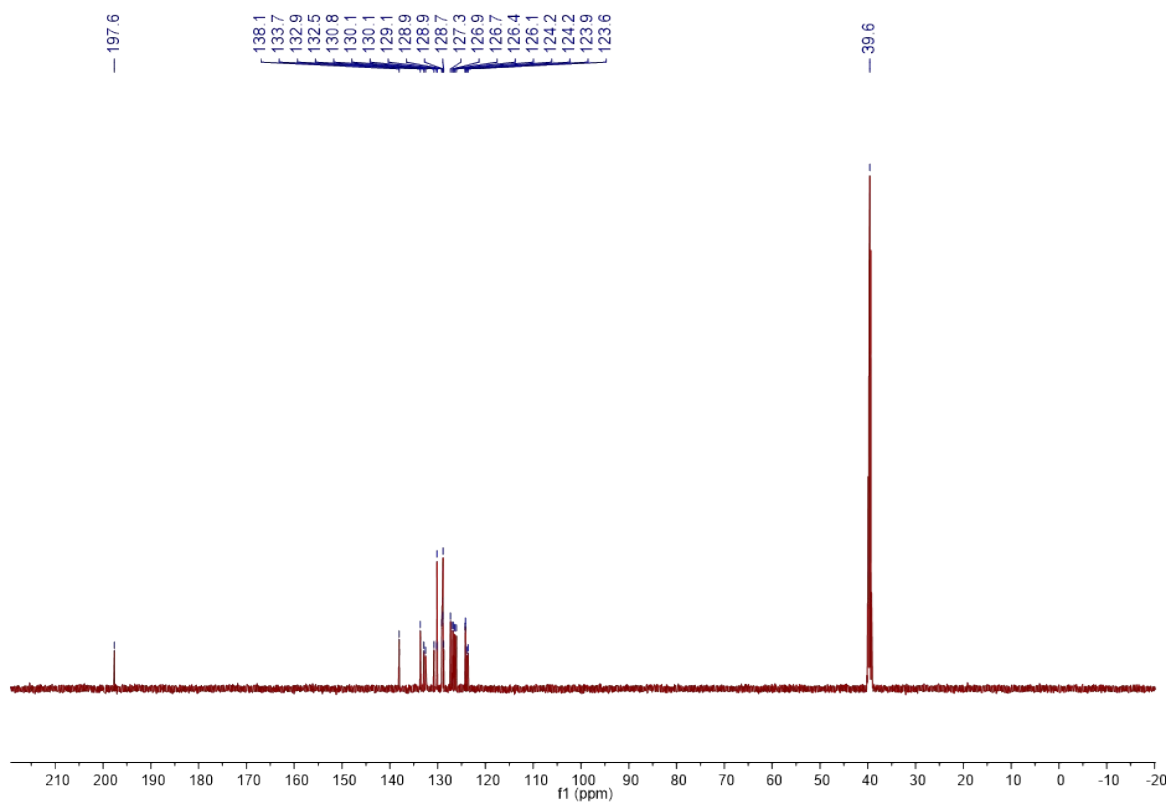

Supplement: d0dt01324b1.pdf [file d0dt01324b1.pdf]
